# Supplementary material for: Online peer support interventions for chronic conditions: a scoping review protocol
Source: PubMed Central journal article supplement — BMJ Open. 2017 Sep 24;7(9):e017999. doi: 10.1136/bmjopen-2017-017999 (PMC5623492; doi:10.1136/bmjopen-2017-017999), 2017-09-24
Supplement: bmjopen-2017-017999.draft_revisions.pdf [file bmjopen-2017-017999.draft_revisions.pdf]

# BMJ Open

BMJ Open is committed to open peer review. As part of this commitment we make the peer review history of every article we publish publicly available.

When an article is published we post the peer reviewers' comments and the authors' responses online. We also post the versions of the paper that were used during peer review. These are the versions that the peer review comments apply to.

The versions of the paper that follow are the versions that were submitted during the peer review process. They are not the versions of record or the final published versions. They should not be cited or distributed as the published version of this manuscript.

BMJ Open is an open access journal and the full, final, typeset and author-corrected version of record of the manuscript is available on our site with no access controls, subscription charges or pay-per-view fees (<http://bmjopen.bmj.com>).

If you have any questions on BMJ Open's open peer review process please email [editorial.bmjopen@bmj.com](mailto:editorial.bmjopen@bmj.com)

# BMJ Open

## Online peer support interventions for chronic conditions: A scoping review protocol

|                                 |                                                                                                                                                                                                                                                                                                                                                                                                                                                                                                                                                                                                                                                                                                                     |
|---------------------------------|---------------------------------------------------------------------------------------------------------------------------------------------------------------------------------------------------------------------------------------------------------------------------------------------------------------------------------------------------------------------------------------------------------------------------------------------------------------------------------------------------------------------------------------------------------------------------------------------------------------------------------------------------------------------------------------------------------------------|
| Journal:                        | <i>BMJ Open</i>                                                                                                                                                                                                                                                                                                                                                                                                                                                                                                                                                                                                                                                                                                     |
| Manuscript ID                   | bmjopen-2017-017999                                                                                                                                                                                                                                                                                                                                                                                                                                                                                                                                                                                                                                                                                                 |
| Article Type:                   | Protocol                                                                                                                                                                                                                                                                                                                                                                                                                                                                                                                                                                                                                                                                                                            |
| Date Submitted by the Author:   | 05-Jun-2017                                                                                                                                                                                                                                                                                                                                                                                                                                                                                                                                                                                                                                                                                                         |
| Complete List of Authors:       | Munce, Sarah; Toronto Rehabilitation Institute, Brain and Spinal Cord Rehabilitation<br>Shepherd, John; University of Toronto, Rehabilitation Sciences Institute<br>Perrier, Laure; University of Toronto, Gerstein Science Information Centre<br>Allin, Sonya; University of Toronto, Physical Therapy<br>Sweet, Shane; McGill University<br>Tomasone, Jennifer; Queen's University, School of Kinesiology and Health Studies<br>Nelson, Michelle; Lunenfeld-Tanenbaum Research Institute, Bridgepoint Collaboratory<br>Guilcher, Sara; University of Toronto, Leslie Dan Faculty of Pharmacy<br>Hossain, Saima; University of Toronto, Physical Therapy<br>Jaglal, Susan; University of Toronto, Physical Therapy |
| <b>Primary Subject Heading</b>: | Research methods                                                                                                                                                                                                                                                                                                                                                                                                                                                                                                                                                                                                                                                                                                    |
| Secondary Subject Heading:      | Evidence based practice, Health services research, Patient-centred medicine                                                                                                                                                                                                                                                                                                                                                                                                                                                                                                                                                                                                                                         |
| Keywords:                       | World Wide Web technology < BIOTECHNOLOGY & BIOINFORMATICS, HEALTH SERVICES ADMINISTRATION & MANAGEMENT, CARDIOLOGY, DIABETES & ENDOCRINOLOGY, ONCOLOGY                                                                                                                                                                                                                                                                                                                                                                                                                                                                                                                                                             |
|                                 |                                                                                                                                                                                                                                                                                                                                                                                                                                                                                                                                                                                                                                                                                                                     |

SCHOLARONE™  
Manuscripts

## Online peer support interventions for chronic conditions: A scoping review protocol

Sarah EP Munce PhD<sup>1</sup>; John Shepherd MBA<sup>2</sup>; Laure Perrier PhD MLIS<sup>3</sup>; Sonya Allin PhD<sup>4</sup>; Shane N Sweet, PhD<sup>5</sup>; Jennifer R Tomasone, PhD<sup>6</sup>; Michelle LA Nelson PhD<sup>7</sup>; Sara JT Guilcher PT, PhD<sup>8</sup>; Saima Hossain BSc<sup>3</sup>, Susan B Jaglal PhD<sup>1,2,4,9</sup>

<sup>1</sup>Toronto Rehabilitation Institute, University Health Network, Toronto, Ontario, Canada

<sup>2</sup>Rehabilitation Sciences Institute, University of Toronto, Toronto, Ontario, Canada

<sup>3</sup>Gerstein Science Information Centre, University of Toronto, Toronto, Ontario, Canada

<sup>4</sup>Department of Physical Therapy, University of Toronto, Toronto, Ontario, Canada

<sup>5</sup>Department of Kinesiology and Physical Education, McGill University, Montreal, Quebec, Canada, & Center for Interdisciplinary Research in Rehabilitation of Greater Montreal

<sup>6</sup>School of Kinesiology and Health Studies, Queen's University, Kingston, Ontario, Canada

<sup>7</sup>Bridgepoint Collaboratory; Lunenfeld-Tanenbaum Research Institute, Toronto, Ontario, Canada

<sup>8</sup>Leslie Dan Faculty of Pharmacy, University of Toronto, Toronto, Ontario, Canada

<sup>9</sup>Institute of Health Policy, Management, and Evaluation, University of Toronto, Toronto, Ontario, Canada

Sarah EP Munce; [sarah.munce@uhn.ca](mailto:sarah.munce@uhn.ca)

John Shepherd; [john.shepherd@mail.utoronto.ca](mailto:john.shepherd@mail.utoronto.ca)

Laure Perrier; [l.perrier@utoronto.ca](mailto:l.perrier@utoronto.ca)

Sonya Allin; [s.allin@utoronto.ca](mailto:s.allin@utoronto.ca)

Shane N Sweet; [shane.sweet@mcgill.ca](mailto:shane.sweet@mcgill.ca)

Jennifer R Tomasone; [tomasone@queensu.ca](mailto:tomasone@queensu.ca)

Michelle LA Nelson; [Michelle.Nelson@sinaihealthsystem.ca](mailto:Michelle.Nelson@sinaihealthsystem.ca)

Sara JT Guilcher; [sara.guilcher@utoronto.ca](mailto:sara.guilcher@utoronto.ca)

Saima Hossain; [hsaima7@gmail.com](mailto:hsaima7@gmail.com)

Susan B Jaglal; [susan.jaglal@utoronto.ca](mailto:susan.jaglal@utoronto.ca)

\*Corresponding Author:

Dr. Sarah Munce

Post-doctoral Fellow

Toronto Rehabilitation Institute-University Health Network

550 University Ave.

Toronto, Ontario, Canada M5G 2A2

Telephone: 416-946-7902

Fax: 416-597-7112

Email: [sarah.munce@mail.utoronto.ca](mailto:sarah.munce@mail.utoronto.ca)

## Abstract

### Introduction:

Peer support is receiving increasing attention as both an effective and cost effective intervention method to support the self-management of chronic health conditions. Given that an increasing proportion of Canadians have internet access and the increasing implementation of web-based interventions, on-line peer support interventions are a promising option to address the burden of chronic diseases. Thus, the specific research question of this scoping review is the following: *What is known from the existing literature about the key characteristics of one-on-one, on-line peer support interventions for adults with chronic conditions?*

### Methods and analysis:

We will use the methodological frameworks used by Arksey and O'Malley as well as Levac and colleagues for the current scoping review. To be eligible for inclusion, studies must report on adults ( $\geq 18$  years of age) with one of the Public Health Agency of Canada chronic conditions or HIV/AIDS. We will limit our review to peer support interventions delivered through on-one-one, on-line formats. All study designs will be included. Only studies published from 2012-onwards will be included to ensure relevance to the current healthcare context and feasibility. Furthermore, only English-language studies will be included. Studies will be identified by searching a variety of databases. Two reviewers will independently screen the titles and abstracts identified by the literature search for inclusion (i.e., level 1 screening), the full text articles (i.e., level 2 screening), and then perform data abstraction. Abstracted data will include study characteristics, participant population, key characteristics of the intervention, and outcomes collected.

### Dissemination:

This scoping review will identify the key features of online peer support interventions. Results will be used specifically to develop an online, peer support program. Future research may also involve a systematic review on the features of effective on-line peer support interventions.

### Strengths and limitations of this study:

This review is guided by known methodological frameworks.

All phases of the review will be conducted in duplicate.

This review will include the Public Health Agency of Canada definition/list of chronic conditions.

This review will not include mental health conditions and a variety of other disabilities.

This review will be limited to English language studies only.

**Keywords:** Peer support interventions, on-line, chronic conditions, scoping review, protocol

## Introduction

More than 20% Canadian adults live with one of the following chronic diseases: cardiovascular diseases, cancer, chronic respiratory diseases, or diabetes.<sup>1</sup> Since 2000, the prevalence rates for cardiovascular diseases and chronic respiratory diseases have increased.<sup>1</sup> Treatment of chronic diseases consumes 67% of all direct health care costs, and cost the Canadian economy \$190 billion annually, with \$68 billion related to treatment costs and the remaining costs related to lost productivity.<sup>2</sup> In the US, approximately 25% of the population has multiple chronic conditions;<sup>3</sup> among Americans aged 65 and older, approximately three in four have multiple chronic conditions.<sup>4</sup> In Australia, more than 7 million people have at least one chronic condition.<sup>5</sup> Thus, it is imperative to develop and implement effective interventions to manage these chronic conditions.

As result of this increasing burden, particularly in health services and related costs, individuals with chronic conditions need assistance in learning and maintaining self-care behaviours that support healthy living, referred to as “chronic disease self-management”.<sup>6-8</sup> Chronic condition self-management refers to a person’s ability to manage the symptoms, treatment, and physical, psychosocial and lifestyle changes that are associated with living with a chronic condition.<sup>7,8</sup> A promising intervention is peer support which is receiving increasing attention as both an effective and cost effective intervention method to support the self-management of chronic health conditions.

There is some emerging evidence demonstrating the effectiveness of peer support for individuals with chronic conditions to self-manage their conditions.<sup>7-10</sup> Peer support refers to “support for a person with a chronic condition from someone with the same condition or similar circumstances”.<sup>6,11</sup> Individuals who provide peer support offer three types of support based on

1  
2  
3 experiential knowledge: emotional, informational and appraisal.<sup>12</sup> Emotional support involves  
4 caring, empathy and encouragement; informational support involves advice, suggestions with  
5 alternative actions, and factual feedback relevant to a particular topic; and appraisal support  
6 involves affirming feelings, thoughts, and behaviors and thus is motivational, encouraging the  
7 individual to continue with problem-solving attempts despite setbacks.<sup>12</sup>  
8  
9

10  
11  
12  
13  
14  
15  
16  
17  
18  
19  
20  
21  
22  
23  
24  
25  
26  
27  
28  
29  
30  
31  
32  
33  
34  
35  
36  
37  
38  
39  
40  
41  
42  
43  
44  
45  
46  
47  
48  
49  
50  
51  
52  
53  
54  
55  
56  
57  
58  
59  
60

There are seven predominant types of peer support models in chronic condition management: professional-led groups that encourage peer interactions, structured peer-led self-management training, peer coaches, community health workers, support groups, telephone-based peer support, and web- and email-based programs.<sup>6</sup> The current review will focus on peer coaches and web- and email-based programs. Given that 80% of Canadian households have the internet,<sup>13</sup> and the increasing use of web-based interventions, there is an increasing need to determine the characteristics of on-line peer support interventions. Thus, the specific research question of this scoping review is the following: What is known from the existing literature about the key characteristics of one-on-one, on-line peer support interventions for adults with chronic conditions?

### **Methods and analysis**

We will use the methodological frameworks proposed by Arksey and O'Malley<sup>14</sup> as well as Levac and colleagues<sup>15</sup> for the current scoping review. The research team has expertise in peer support across chronic conditions (SEPM, JS, SA, SNS, MLAN, SJTG, SBJ), online interventions (SA, SM, SBJ), and knowledge synthesis methods (SEPM, LP, JRT, MLAN, SJTG, SBJ). Although traditionally applied to systematic review protocols, the Preferred Reporting Items for Systematic Reviews and Meta-analysis for Protocols (PRISMA-P)<sup>16</sup> was used to draft this protocol.

### *Eligibility criteria*

For the purpose of this review, we will include chronic diseases identified by the Public Health Agency of Canada (PHAC), including cancer, heart (cardiovascular disease), hypertension, stroke, chronic respiratory diseases (asthma, chronic obstructive pulmonary disease, sleep apnea), diabetes, inflammatory bowel diseases (Crohn's Disease, ulcerative colitis) multiple sclerosis, neurological conditions (e.g., Alzheimer's disease and other dementias, cerebral palsy, epilepsy, multiple sclerosis, Parkinson's disease/parkinsonism, traumatic brain injury, and traumatic spinal cord injury (SCI)), arthritis, and osteoporosis.<sup>17</sup> Mental illness was excluded from the list given that peer support interventions for this group may have particularly unique features not generalizable to other chronic disease patient populations, as previously determined in a systematic review on the effectiveness of quality improvement strategies for coordination of care to reduce use of health care services.<sup>18</sup> To this list, we have also included HIV/AIDS (which, from our preliminary research, has a significant amount of literature on peer support interventions,<sup>19</sup> and is increasingly being viewed as a chronic condition). Studies including individuals with co-morbidities (including mental illness) will be accepted. Thus, to be eligible for inclusion, the studies must report on adults ( $\geq 18$  years of age) with one of these PHAC chronic conditions (excluding mental illness) or HIV/AIDS. We will limit our review to peer support intervention delivered through on-one-one, on-line formats. These on-line interventions could include Skype-based discussions or social media peer interactions, for example. Therefore, interventions that are professional-led groups that encourage face-to-face peer interactions, involve community health workers who are not peers, support groups, and provide telephone-based peer support will be excluded. All study designs will be included (e.g., observational studies, randomized controlled trials and qualitative studies). Only studies

1  
2  
3 published from 2012-onwards will be included to ensure relevance to the current healthcare  
4 context, technology, and feasibility. Furthermore, only English-language studies will be  
5 included, which may result in a predisposition in results towards English language speaking  
6 countries.  
7  
8  
9  
10  
11

### 12 ***Search strategy and information sources***

13  
14  
15 Literature search strategies will be developed using medical subject headings (MeSH)  
16 and text words related to chronic conditions and peer support interventions. Studies will be  
17 identified by searching Medline (OVID interface), CINAHL (EBSCO interface), EMBASE  
18 (OVID interface), PsycInfo (OVID interface), and Cochrane Central Register Controlled Trials  
19 (Cochrane Library) and PEDro (physiotherapy evidence database). The search strategy for  
20 Medline can be found in Additional File 1. A hand search of the reference lists from reviews and  
21 selected articles will be made to ensure literature saturation. Finally, experts in the field of peer  
22 support will be contacted and consulted in order to ensure that all relevant data is obtained,  
23 including members of the research team. An information specialist (LP) who is expert in  
24 systematic and scoping reviews will conduct all of the literature searches.  
25  
26  
27  
28  
29  
30  
31  
32  
33  
34  
35  
36  
37  
38

### 39 ***Study selection***

40  
41 To promote the reliability of screening by the two reviewers, a pilot test of the level 1  
42 screening form based on the criteria outlined above will be conducted on a random sample of  
43 approximately 100 articles. The  $\kappa$  statistic will then be calculated to determine the inter-rater  
44 reliability for study inclusion.<sup>20</sup> If low agreement is observed, the inclusion and exclusion  
45 criteria will be simplified to increase the consistent application of the selection criteria. Two  
46 reviewers will independently screen the titles and abstracts identified by the literature search for  
47 inclusion using the screening form (i.e., level 1 screening). The full text of potentially relevant  
48  
49  
50  
51  
52  
53  
54  
55  
56  
57  
58  
59  
60



1  
2  
3 articles will then be collected and screened to determine final inclusion (i.e., level 2 screening).

4  
5 A pilot test of the level 2 screening form will be performed on approximately 1% of the articles  
6  
7  
8 and the inter-rater reliability for study inclusion will also be calculated.<sup>20</sup> A third reviewer who  
9  
10 is knowledgeable in the research area will be available to resolve discrepancies, if necessary.

11  
12 Studies excluded during the screening phases will be documented in an electronic database along  
13  
14 with an explanation for the exclusion.

### 15 16 17 ***Data items and data collection process***

18  
19 Abstracted data will include study characteristics (e.g., year of publication, country of  
20  
21 study), participant population (e.g., chronic disease condition, income, ethnicity, age, sex,  
22  
23 education), key characteristics of the intervention (e.g., duration, frequency, theory of change for  
24  
25 the intervention, etc.), and type of outcome collected (if applicable) as well as results (i.e.,  
26  
27 efficacy or effectiveness). Additional categories may be identified through the completion of the  
28  
29 search and through discussions with the research team and key stakeholders. A data abstraction  
30  
31 form will also be pilot tested and modified if poor agreement is observed. For example, any  
32  
33 wording on the form that may be related to poor agreement will be reviewed and changed. Two  
34  
35 reviewers will independently abstract all of the data and a discussion or the involvement of a  
36  
37 third reviewer will resolve disagreements. Study quality will not be evaluated as the purpose of  
38  
39 a scoping review is to identify gaps in the literature and future areas for a systematic review.<sup>15,16</sup>  
40  
41  
42  
43  
44  
45  
46 Covidence will be used to manage the records and data throughout the review.  
47

### 48 49 ***Synthesis***

50  
51 The data from this scoping review will be summarized quantitatively using numerical  
52  
53 counts and qualitatively using thematic analysis and will be grouped by chronic condition type.  
54  
55  
56 The results of this review will determine the key characteristics (e.g., duration, frequency,  
57  
58  
59  
60

1  
2  
3 theoretical orientation, etc.) of one-on-one, on-line peer support interventions for adults with  
4  
5 chronic conditions. This scoping review will identify gaps in the literature as well as future areas  
6  
7 for study either via implementation studies, consensus meeting, or systematic review.  
8  
9

## 10 **Dissemination**

11  
12 Knowledge translation activities will occur at the beginning of the review and continue  
13  
14 throughout with dissemination of the research question to key stakeholders such as the Ontario  
15  
16 Ministry of Health and Long-term Care, the Ontario Peer Development Initiative, March of  
17  
18 Dimes Canada, SCI Canada, Rick Hansen Institute, and the Ontario Neurotrauma Foundation.  
19  
20 End-of-grant knowledge translation could also take place through these organizations and their  
21  
22 outlets (e.g., print and online newsletters) as well as through traditional knowledge translation  
23  
24 mechanisms (e.g., peer-reviewed journals and conference). For example, the results of the  
25  
26 scoping review will be presented at meetings locally, nationally, and internationally (e.g.,  
27  
28 National Conference on Peer Support, American Medical Informatics Association) and published  
29  
30 in a peer-reviewed journal so that results are available to the appropriate academic and clinical  
31  
32 audiences. Finally, partnerships with local clinical programs and/or research initiatives will be  
33  
34 made so that the results are disseminated in a timely and effective manner. This scoping review  
35  
36 will identify the key features of peer support interventions and will be used specifically to inform  
37  
38 the development of an online, peer support program (i.e., online peer support program for  
39  
40 individuals with SCI). Depending on the evidence base found, future research may also involve  
41  
42 a systematic review on the features of effective on-line peer support interventions.  
43  
44  
45  
46  
47  
48  
49  
50  
51  
52  
53  
54  
55  
56  
57  
58  
59  
60

## Footnotes

**Contributors:** SEPM conceived of the scoping review, together with JS, LP and SBJ. SEPM wrote the first draft of the protocol. SEPM is the guarantor of the review. SEPM, JS, and LP were involved in the preliminary literature review. LP conducted the literature search. LP provided methodological expertise (knowledge synthesis). JS, SA, SNS, JRT, SJTG, and MLAN provided critical content expertise on peer support that was integrated into the current protocol. SEPM, JS, LP, SA, SNS, JRT, MLAN, SJTG, SH, and SBJ were involved in editing and revising the protocol for important intellectual content. SEPM, JS, LP, SA, SNS, JRT, MLAN, SJTG, SH, and SBJ approved the final version of the protocol.

**Funding:** This work was supported by the Ontario Neurotrauma Foundation (ONF) and the Rick Hansen Institute (RHI). The ONF and RHI had no role in developing this protocol. SEP Munce is/has been supported by a Heart and Stroke Foundation of Canada Focus on Stroke Fellowship, Toronto Rehabilitation Institute-University Health Network, Canadian Institutes of Health Research Fellowship, and a European Stroke Research Foundation Investigator Award. SNS is supported by a salary award from FRQS Chercheurs-Boursiers, Junior 1 program.

**Competing interests:** None.

**Provenance and peer review:** Not commissioned; externally peer reviewed.

## References

1. Public Health Agency of Canada. How healthy are Canadians? A trend analysis of the health of Canadians from a healthy living and chronic disease perspective. Ottawa, ON: Public Health Agency of Canada, 2016.
2. Elmslie, K. Against the growing burden of disease. Ottawa, ON: Public Health Agency of Canada, 2016.
3. US Department of Health and Human Services. Multiple chronic conditions – a strategic framework: optimum health and quality of life for individuals with multiple chronic conditions. Washington, DC: US Department of Health and Human Services, 2010.
4. Gerteis J, Izrael D, Deitz D, et al. Multiple chronic conditions chartbook. Rockville, MD: Agency for Healthcare Research and Quality, 2014.
5. Australian Institute of Health and Welfare. Authoritative information and statistics to promote better health and well-being: chronic diseases. <http://www.aihw.gov.au/chronic-diseases/>
6. Heisler M. Overview of peer support models to improve diabetes self-management and clinical outcomes. *Diabetes Spectrum* 2007; 20:214-223.
7. de Silva D. Helping people help themselves: a review of the evidence considering whether or not it is worthwhile to support self-management. London, UK: The Health Foundation, 2011.
8. Health Council of Canada. Self-management support for Canadians with chronic conditions: a focus for primary care. [http://www.healthcouncilcanada.ca/rpt\\_det.php?id=372](http://www.healthcouncilcanada.ca/rpt_det.php?id=372)
9. Cook JA, Copeland ME, Corey L, et al. Developing the evidence base for peer-led services: changes among participants following Wellness Recovery Action Planning (WRAP) Education in two statewide initiatives. *Psychiatr Rehabil J* 2010;34:113-20.
10. Chronic Illness Alliance. Peer support for chronic and complex conditions: a literature review. <http://www.chronicillness.org.au/>
11. Lauckner HM, Hutchinson SL. Peer support for people with chronic conditions in rural areas: a scoping review. *Rural Remote Health* 2016; 16:3601.
12. Dennis C. Peer support within a health care context: a concept analysis. *Int J Nurs Stud* 2003; 40:321-32.
13. Statistics Canada. Internet in 4 out of 5 households. Ottawa, ON: Statistics Canada, 2010.
14. Arksey H, O'Malley L. Scoping studies: towards a methodological framework. *Int J Soc Res Methodol* 2005; 8:19-32

- 1  
2  
3 15. Levac DC, Colquhoun H, O'Brien KK. Scoping studies: advancing the methodology.  
4 Implement Sci 2010; 5:69.  
5  
6
- 7 16. Shamseer L, Moher D, Clarke M et al. Preferred reporting items for systematic review and  
8 meta-analysis protocols (PRISMA-P) 2015: elaboration and explanation. BMJ 2015; 349.  
9
- 10 17. Public Health Agency of Canada. Chronic diseases. [http://www.phac-aspc.gc.ca/cd-  
12 mc/index-eng.php](http://www.phac-aspc.gc.ca/cd-<br/>11 mc/index-eng.php)  
13
- 14 18. Tricco AC, Antony J, Ivers NM, et al. Effectiveness of quality improvement strategies for  
15 coordination of care to reduce use of health care services: a systematic review and meta-analysis.  
16 CMAJ 2014; 186:E568-78.  
17
- 18 19. Prestage G, Brown G, Allan B, et al. Impact of peer support on behaviour change among  
19 newly diagnosed Australian gay men. J Acquir Immune Defic Syndr 2016; 72:565-71.  
20  
21
- 22 20. Landis JR, Koch GG. The measurement of observer agreement for categorical data.  
23 Biometrics 1977; 33:159-74.  
24  
25  
26  
27  
28  
29  
30  
31  
32  
33  
34  
35  
36  
37  
38  
39  
40  
41  
42  
43  
44  
45  
46  
47  
48  
49  
50  
51  
52  
53  
54  
55  
56  
57  
58  
59  
60

1  
2  
3 Database: Ovid MEDLINE: Epub Ahead of Print, In-Process & Other Non-Indexed Citations, Ovid  
4 MEDLINE® Daily and Ovid MEDLINE® <1946-Present>

5 Search Strategy:  
6  
7

- 8 -----  
9  
10 1 Diabetes Mellitus/ [ Diabetes Mellitus ] (106925)  
11 2 Diabetes Mellitus, Type 1/ (69361)  
12 3 Diabetes Mellitus, Type 2/ (108663)  
13 4 Diabetes Complications/ (39462)  
14 5 diabet\$.tw. (523081)  
15 6 (insulin\$ adj depend\$).tw. (29179)  
16 7 insulin?depend\$.tw. (43)  
17 8 exp Pulmonary Disease, Chronic Obstructive/ [ COPD ] (46140)  
18 9 COPD.tw. (35401)  
19 10 COAD.tw. (245)  
20 11 "chronic airflow obstruction".tw. (543)  
21 12 "obstructive lung disease\$.tw. (6025)  
22 13 "obstructive pulmonary disease\$.tw. (38490)  
23 14 Cardiovascular Diseases/ [ Cardiovascular Disease/Stroke/Hypertension ] (126070)  
24 15 Cerebrovascular Disorders/ (45398)  
25 16 exp Heart Diseases/ (1028587)  
26 17 exp Hypertension/ (238378)  
27 18 exp Hyperlipidemias/ (62478)  
28 19 exp Stroke/ (107275)  
29 20 (cardiovascular adj disease?).tw. (132985)  
30 21 (cardio-vascular adj disease?).tw. (566)  
31 22 (cardiac adj arrest\$).tw. (27050)  
32 23 (coronary adj disease\$).tw. (13690)  
33 24 cerebrovasc\$.tw. (45920)  
34 25 (cerebral adj vasc\$).tw. (7701)  
35 26 (heart adj failure).tw. (136198)  
36 27 (heart adj disease\$).tw. (148046)  
37 28 (heart adj attack\$).tw. (4829)  
38 29 "high blood pressure".tw. (12751)  
39 30 hypertensi\$.tw. (380148)  
40 31 hyperlipid\$.tw. (26714)  
41 32 hypercholesterol\$.tw. (31280)  
42 33 poststroke.tw. (3944)  
43  
44  
45  
46  
47  
48  
49  
50  
51  
52  
53  
54  
55  
56  
57  
58  
59  
60

1  
2  
3  
4 34 post-stroke.tw. (6330)  
5 35 stroke.tw. (191278)  
6 36 exp Carcinoma/ [ Cancer ] (575751)  
7 37 exp Neoplasms/ (2988852)  
8 38 carcinoma\$.tw. (574831)  
9 39 neoplasm\$.tw. (119477)  
10 40 tumor\$.tw. (1441627)  
11 41 cancer\$.tw. (1434821)  
12 42 exp Osteoporosis/ [ Osteoporosis ] (50872)  
13 43 osteoporosis.tw. (56120)  
14 44 exp Arthritis/ [ Arthritis ] (235024)  
15 45 arthriti\$.tw. (158150)  
16 46 osteoarthriti\$.tw. (51431)  
17 47 osteo-arthriti\$.tw. (404)  
18 48 rheumati\$.tw. (49733)  
19 49 exp Asthma/ [ Asthma ] (117410)  
20 50 asthma\$.tw. (138598)  
21 51 exp Inflammatory Bowel Diseases/ [ IBD ] (69727)  
22 52 "inflammatory bowel disease?".tw. (36528)  
23 53 IBD.tw. (17629)  
24 54 (ulcer\$ adj colit\$).tw. (32683)  
25 55 crohn\$.tw. (39743)  
26 56 Motor Neuron Disease/ [ Neurological Conditions ] (4006)  
27 57 "motor neuron disease?".tw. (4361)  
28 58 (motorneuron adj disease).tw. (15)  
29 59 (motoneuron adj disease).tw. (267)  
30 60 Multiple Sclerosis/ [ MS ] (46517)  
31 61 Multiple Sclerosis, Chronic Progressive/ (1723)  
32 62 Multiple Sclerosis, Relapsing-Remitting/ (4962)  
33 63 (multiple adj sclerosis).tw. (62635)  
34 64 exp Spinal Cord Injuries/ [ SCI ] (43135)  
35 65 exp Paraplegia/ (12583)  
36 66 exp Quadriplegia/ (7638)  
37 67 paraplegi\$.tw. (14828)  
38 68 quadriplegi\$.tw. (3836)  
39 69 tetraplegi\$.tw. (3762)  
40 70 ("spinal cord" adj injur\$).tw. (31617)  
41  
42  
43  
44  
45  
46  
47  
48  
49  
50  
51  
52  
53  
54  
55  
56  
57  
58  
59  
60

- 1  
2  
3  
4 71 ("spinal cord" adj trauma\$.tw. (881)  
5 72 SCI.tw. (28016)  
6 73 exp Sleep Apnea Syndromes/ [ Sleep Apnea ] (29614)  
7 74 (sleep adj apn?ea?).tw. (29165)  
8 75 exp HIV/ [ HIV/AIDS ] (90847)  
9 76 Acquired Immunodeficiency Syndrome/ (76092)  
10 77 AIDS.tw. (137756)  
11 78 HIV.tw. (275603)  
12 79 (human adj immunodeficiency).tw. (80198)  
13 80 "acquired immunodeficiency syndrome".tw. (15520)  
14 81 "acquired immune deficiency syndrome".tw. (5532)  
15 82 or/1-81 (6864407)  
16 83 Peer Group/ [ Peer Support ] (17371)  
17 84 Volunteers/ (8787)  
18 85 peer.tw. (47864)  
19 86 peers.tw. (23571)  
20 87 volunteer?.tw. (166313)  
21 88 advice.tw. (40431)  
22 89 advis\$.tw. (58943)  
23 90 (health adj coach\$.tw. (456)  
24 91 counsel\$.tw. (89121)  
25 92 (lay\$ adj led).tw. (121)  
26 93 (lay\$ adj run).tw. (12)  
27 94 (lay\$ adj help\$.tw. (91)  
28 95 (lay\$ adj support\$.tw. (288)  
29 96 (lay\$ adj visit\$.tw. (11)  
30 97 (lay\$ adj based).tw. (514)  
31 98 (lay\$ adj deliver\$.tw. (19)  
32 99 (user\$ adj led).tw. (102)  
33 100 (user\$ adj run).tw. (15)  
34 101 (user\$ adj based).tw. (363)  
35 102 layperson\$.tw. (1198)  
36 103 (lay adj person\$.tw. (666)  
37 104 (community adj person\$.tw. (78)  
38 105 (support adj person\$.tw. (1127)  
39 106 (community adj based).tw. (48065)  
40 107 (community adj visit\$.tw. (64)  
41  
42  
43  
44  
45  
46  
47  
48  
49  
50  
51  
52  
53  
54  
55  
56  
57  
58  
59  
60



1  
2  
3  
4 108 (home adj based).tw. (7657)  
5 109 (home adj visit\$.tw. (7270)  
6 110 (expert adj patient?).tw. (207)  
7  
8 111 (non adj professional?).tw. (1234)  
9  
10 112 nonprofessional?.tw. (1057)  
11 113 (non adj medical).tw. (4572)  
12  
13 114 nonmedical.tw. (3177)  
14 115 (mutual adj aid).tw. (323)  
15 116 (mutual adj support?).tw. (510)  
16  
17 117 (supportive adj relationship).tw. (152)  
18 118 mentor\$.tw. (11672)  
19  
20 119 (community adj worker?).tw. (368)  
21 120 (lay adj worker?).tw. (84)  
22  
23 121 (support adj worker?).tw. (663)  
24 122 (voluntary adj work\$.tw. (251)  
25  
26 123 (voluntary adj care).tw. (33)  
27 124 (voluntary adj involvement).tw. (19)  
28  
29 125 (voluntary adj help\$.tw. (43)  
30 126 (voluntary adj counsel\$.tw. (1052)  
31  
32 127 or/83-126 (498143)  
33 128 Computer-Assisted Instruction/ (11051)  
34  
35 129 exp Internet/ (64547)  
36 130 exp Software/ (133078)  
37  
38 131 Mobile Applications/ (1899)  
39 132 User-Computer Interface/ (33561)  
40  
41 133 Web Browser/ (384)  
42 134 Computers/ (50698)  
43  
44 135 exp Microcomputers/ (18257)  
45 136 exp Cell Phones/ (8858)  
46  
47 137 Educational Technology/ (1342)  
48 138 Electronic Mail/ (2366)  
49  
50 139 Webcasts/ (449)  
51 140 exp Videoconferencing/ (1436)  
52  
53 141 chatroom\$.tw. (49)  
54 142 (chat adj room\$.tw. (275)  
55  
56 143 email\$.tw. (5122)  
57 144 e-mail\$.tw. (6846)  
58  
59  
60

- 1  
2  
3  
4 145 (web adj based).tw. (22206)  
5 146 (computer adj based).tw. (12251)  
6 147 online.tw. (70773)  
7  
8 148 (computer adj mediated).tw. (447)  
9  
10 149 virtual.tw. (43005)  
11 150 (computer adj assisted).tw. (22697)  
12 151 Internet.mp. (83576)  
13  
14 152 (computer adj supported).tw. (425)  
15 153 (hand adj held).tw. (5605)  
16  
17 154 "personal digital assistant?".tw. (990)  
18 155 ebased.tw. (0)  
19  
20 156 e-based.tw. (227)  
21 157 on-line.tw. (23870)  
22  
23 158 computer\$.tw. (268656)  
24 159 (information adj technolog\$.tw. (10318)  
25  
26 160 website\$.tw. (18794)  
27 161 web-site\$.tw. (7251)  
28  
29 162 e-health.tw. (1569)  
30 163 ehealth.tw. (1427)  
31  
32 164 (electronic adj health).tw. (9090)  
33 165 (mobile adj phone\$.tw. (5367)  
34 166 (cell adj phone\$.tw. (1928)  
35 167 smartphone\$.tw. (4315)  
36 168 smart-phone\$.tw. (677)  
37  
38 169 (mobile adj app\$.tw. (1447)  
39 170 or/128-169 (626750)  
40  
41 171 exp adult/ [ Adult filter - validated ] (6417105)  
42 172 adult.mp. (5014578)  
43 173 Middle Aged/ (3849721)  
44 174 age\$.tw. (3111391)  
45 175 or/171-174 (8450657)  
46  
47 176 82 and 127 and 170 and 175 (3766)  
48 177 exp Animals/ not (exp Animals/ and Humans/) (4384144)  
49 178 176 not 177 (3764)  
50  
51 179 limit 178 to (english language and yr="2007 -Current") (2628)  
52  
53  
54  
55  
56  
57  
58  
59  
60

\*\*\*\*\*

**PRISMA-P (Preferred Reporting Items for Systematic review and Meta-Analysis Protocols) 2015 checklist: recommended items to address in a systematic review protocol\* - NOTE that the current manuscript is a **scoping review protocol****

| Section and topic                 | Item No | Checklist item                                                                                                                                                                                                                              |
|-----------------------------------|---------|---------------------------------------------------------------------------------------------------------------------------------------------------------------------------------------------------------------------------------------------|
| <b>ADMINISTRATIVE INFORMATION</b> |         |                                                                                                                                                                                                                                             |
| Title:                            |         |                                                                                                                                                                                                                                             |
| Identification                    | 1a      | Identify the report as a protocol of a systematic review <b>page 1</b>                                                                                                                                                                      |
| Update                            | 1b      | If the protocol is for an update of a previous systematic review, identify as such <b>N/A</b> .                                                                                                                                             |
| Registration                      | 2       | If registered, provide the name of the registry (such as PROSPERO) and registration number <b>N/A as this is a scoping review.</b>                                                                                                          |
| Authors:                          |         |                                                                                                                                                                                                                                             |
| Contact                           | 3a      | Provide name, institutional affiliation, e-mail address of all protocol authors; provide physical mailing address of corresponding author <b>page 1</b>                                                                                     |
| Contributions                     | 3b      | Describe contributions of protocol authors and identify the guarantor of the review <b>page 9</b>                                                                                                                                           |
| Amendments                        | 4       | If the protocol represents an amendment of a previously completed or published protocol, identify as such and list changes; otherwise, state plan for documenting important protocol amendments <b>N/A</b>                                  |
| Support:                          |         |                                                                                                                                                                                                                                             |
| Sources                           | 5a      | Indicate sources of financial or other support for the review <b>page 9</b>                                                                                                                                                                 |
| Sponsor                           | 5b      | Provide name for the review funder and/or sponsor <b>page 9</b>                                                                                                                                                                             |
| Role of sponsor or funder         | 5c      | Describe roles of funder(s), sponsor(s), and/or institution(s), if any, in developing the protocol <b>page 9</b>                                                                                                                            |
| <b>INTRODUCTION</b>               |         |                                                                                                                                                                                                                                             |
| Rationale                         | 6       | Describe the rationale for the review in the context of what is already known <b>pages 3-4</b>                                                                                                                                              |
| Objectives                        | 7       | Provide an explicit statement of the question(s) the review will address with reference to participants, interventions, comparators, and outcomes (PICO) <b>page 4</b>                                                                      |
| <b>METHODS</b>                    |         |                                                                                                                                                                                                                                             |
| Eligibility criteria              | 8       | Specify the study characteristics (such as PICO, study design, setting, time frame) and report characteristics (such as years considered, language, publication status) to be used as criteria for eligibility for the review <b>page 5</b> |
| Information sources               | 9       | Describe all intended information sources (such as electronic databases, contact with study authors, trial registers or other grey literature sources) with planned dates of coverage <b>page 6</b>                                         |
| Search strategy                   | 10      | Present draft of search strategy to be used for at least one electronic database, including planned limits, such that it could be repeated <b>Additional File 1</b>                                                                         |
| Study records:                    |         |                                                                                                                                                                                                                                             |

|                                    |     |                                                                                                                                                                                                                                                              |
|------------------------------------|-----|--------------------------------------------------------------------------------------------------------------------------------------------------------------------------------------------------------------------------------------------------------------|
| Data management                    | 11a | Describe the mechanism(s) that will be used to manage records and data throughout the review <b>page 7</b>                                                                                                                                                   |
| Selection process                  | 11b | State the process that will be used for selecting studies (such as two independent reviewers) through each phase of the review (that is, screening, eligibility and inclusion in meta-analysis) <b>pages 6-7</b>                                             |
| Data collection process            | 11c | Describe planned method of extracting data from reports (such as piloting forms, done independently, in duplicate), any processes for obtaining and confirming data from investigators <b>page 7</b>                                                         |
| Data items                         | 12  | List and define all variables for which data will be sought (such as PICO items, funding sources), any pre-planned data assumptions and simplifications <b>pages 7-8 (data abstraction)</b>                                                                  |
| Outcomes and prioritization        | 13  | List and define all outcomes for which data will be sought, including prioritization of main and additional outcomes, with rationale <b>pages 7-8 (data abstraction)</b>                                                                                     |
| Risk of bias in individual studies | 14  | Describe anticipated methods for assessing risk of bias of individual studies, including whether this will be done at the outcome or study level, or both; state how this information will be used in data synthesis <b>N/A as this is a scoping review.</b> |
| Data synthesis                     | 15a | Describe criteria under which study data will be quantitatively synthesised <b>page 7</b>                                                                                                                                                                    |
|                                    | 15b | If data are appropriate for quantitative synthesis, describe planned summary measures, methods of handling data and methods of combining data from studies, including any planned exploration of consistency (such as $I^2$ , Kendall's $\tau$ ) <b>N/A</b>  |
|                                    | 15c | Describe any proposed additional analyses (such as sensitivity or subgroup analyses, meta-regression) <b>N/A</b>                                                                                                                                             |
|                                    | 15d | If quantitative synthesis is not appropriate, describe the type of summary planned <b>N/A</b>                                                                                                                                                                |
| Meta-bias(es)                      | 16  | Specify any planned assessment of meta-bias(es) (such as publication bias across studies, selective reporting within studies) <b>N/A as this is a scoping review.</b>                                                                                        |
| Confidence in cumulative evidence  | 17  | Describe how the strength of the body of evidence will be assessed (such as GRADE) <b>N/A as this is a scoping review.</b>                                                                                                                                   |

**\* It is strongly recommended that this checklist be read in conjunction with the PRISMA-P Explanation and Elaboration (cite when available) for important clarification on the items. Amendments to a review protocol should be tracked and dated. The copyright for PRISMA-P (including checklist) is held by the PRISMA-P Group and is distributed under a Creative Commons Attribution Licence 4.0.**

*From: Shamseer L, Moher D, Clarke M, Ghersi D, Liberati A, Petticrew M, Shekelle P, Stewart L, PRISMA-P Group. Preferred reporting items for systematic review and meta-analysis protocols (PRISMA-P) 2015: elaboration and explanation. BMJ. 2015 Jan 2;349(jan02 1):g7647.*

# BMJ Open

## Online peer support interventions for chronic conditions: A scoping review protocol

|                                 |                                                                                                                                                                                                                                                                                                                                                                                                                                                                                                                                                                                                                                                                                                                     |
|---------------------------------|---------------------------------------------------------------------------------------------------------------------------------------------------------------------------------------------------------------------------------------------------------------------------------------------------------------------------------------------------------------------------------------------------------------------------------------------------------------------------------------------------------------------------------------------------------------------------------------------------------------------------------------------------------------------------------------------------------------------|
| Journal:                        | <i>BMJ Open</i>                                                                                                                                                                                                                                                                                                                                                                                                                                                                                                                                                                                                                                                                                                     |
| Manuscript ID                   | bmjopen-2017-017999.R1                                                                                                                                                                                                                                                                                                                                                                                                                                                                                                                                                                                                                                                                                              |
| Article Type:                   | Protocol                                                                                                                                                                                                                                                                                                                                                                                                                                                                                                                                                                                                                                                                                                            |
| Date Submitted by the Author:   | 19-Jul-2017                                                                                                                                                                                                                                                                                                                                                                                                                                                                                                                                                                                                                                                                                                         |
| Complete List of Authors:       | Munce, Sarah; Toronto Rehabilitation Institute, Brain and Spinal Cord Rehabilitation<br>Shepherd, John; University of Toronto, Rehabilitation Sciences Institute<br>Perrier, Laure; University of Toronto, Gerstein Science Information Centre<br>Allin, Sonya; University of Toronto, Physical Therapy<br>Sweet, Shane; McGill University<br>Tomasone, Jennifer; Queen's University, School of Kinesiology and Health Studies<br>Nelson, Michelle; Lunenfeld-Tanenbaum Research Institute, Bridgepoint Collaboratory<br>Guilcher, Sara; University of Toronto, Leslie Dan Faculty of Pharmacy<br>Hossain, Saima; University of Toronto, Physical Therapy<br>Jaglal, Susan; University of Toronto, Physical Therapy |
| <b>Primary Subject Heading</b>: | Research methods                                                                                                                                                                                                                                                                                                                                                                                                                                                                                                                                                                                                                                                                                                    |
| Secondary Subject Heading:      | Evidence based practice, Health services research, Patient-centred medicine                                                                                                                                                                                                                                                                                                                                                                                                                                                                                                                                                                                                                                         |
| Keywords:                       | World Wide Web technology < BIOTECHNOLOGY & BIOINFORMATICS, HEALTH SERVICES ADMINISTRATION & MANAGEMENT, CARDIOLOGY, DIABETES & ENDOCRINOLOGY, ONCOLOGY                                                                                                                                                                                                                                                                                                                                                                                                                                                                                                                                                             |
|                                 |                                                                                                                                                                                                                                                                                                                                                                                                                                                                                                                                                                                                                                                                                                                     |

SCHOLARONE™  
Manuscripts

## Online peer support interventions for chronic conditions: A scoping review protocol

Sarah EP Munce PhD<sup>1</sup>; John Shepherd MBA<sup>2</sup>; Laure Perrier PhD MLIS<sup>3</sup>; Sonya Allin PhD<sup>4</sup>; Shane N Sweet, PhD<sup>5</sup>; Jennifer R Tomasone, PhD<sup>6</sup>; Michelle LA Nelson PhD<sup>7</sup>; Sara JT Guilcher PT, PhD<sup>8</sup>; Saima Hossain BSc<sup>3</sup>, Susan B Jaglal PhD<sup>1,2,4,9</sup>

<sup>1</sup>Toronto Rehabilitation Institute, University Health Network, Toronto, Ontario, Canada

<sup>2</sup>Rehabilitation Sciences Institute, University of Toronto, Toronto, Ontario, Canada

<sup>3</sup>Gerstein Science Information Centre, University of Toronto, Toronto, Ontario, Canada

<sup>4</sup>Department of Physical Therapy, University of Toronto, Toronto, Ontario, Canada

<sup>5</sup>Department of Kinesiology and Physical Education, McGill University, Montreal, Quebec, Canada, & Center for Interdisciplinary Research in Rehabilitation of Greater Montreal

<sup>6</sup>School of Kinesiology and Health Studies, Queen's University, Kingston, Ontario, Canada

<sup>7</sup>Bridgepoint Collaboratory; Lunenfeld-Tanenbaum Research Institute, Toronto, Ontario, Canada

<sup>8</sup>Leslie Dan Faculty of Pharmacy, University of Toronto, Toronto, Ontario, Canada

<sup>9</sup>Institute of Health Policy, Management, and Evaluation, University of Toronto, Toronto, Ontario, Canada

Sarah EP Munce; [sarah.munce@uhn.ca](mailto:sarah.munce@uhn.ca)

John Shepherd; [john.shepherd@mail.utoronto.ca](mailto:john.shepherd@mail.utoronto.ca)

Laure Perrier; [l.perrier@utoronto.ca](mailto:l.perrier@utoronto.ca)

Sonya Allin; [s.allin@utoronto.ca](mailto:s.allin@utoronto.ca)

Shane N Sweet; [shane.sweet@mcgill.ca](mailto:shane.sweet@mcgill.ca)

Jennifer R Tomasone; [tomasone@queensu.ca](mailto:tomasone@queensu.ca)

Michelle LA Nelson; [Michelle.Nelson@sinaihealthsystem.ca](mailto:Michelle.Nelson@sinaihealthsystem.ca)

Sara JT Guilcher; [sara.guilcher@utoronto.ca](mailto:sara.guilcher@utoronto.ca)

Saima Hossain; [hsaima7@gmail.com](mailto:hsaima7@gmail.com)

Susan B Jaglal; [susan.jaglal@utoronto.ca](mailto:susan.jaglal@utoronto.ca)

\*Corresponding Author:

Dr. Sarah Munce

Post-doctoral Fellow

Toronto Rehabilitation Institute-University Health Network

550 University Ave.

Toronto, Ontario, Canada M5G 2A2

Telephone: 416-946-7902

Fax: 416-597-7112

Email: [sarah.munce@mail.utoronto.ca](mailto:sarah.munce@mail.utoronto.ca)

## Abstract

### Introduction:

Peer support is receiving increasing attention as both an effective and cost effective intervention method to support the self-management of chronic health conditions. Given that an increasing proportion of Canadians have internet access and the increasing implementation of web-based interventions, on-line peer support interventions are a promising option to address the burden of chronic diseases. Thus, the specific research question of this scoping review is the following: *What is known from the existing literature about the key characteristics of one-on-one, on-line peer support interventions for adults with chronic conditions?*

### Methods and analysis:

We will use the methodological frameworks used by Arksey and O'Malley as well as Levac and colleagues for the current scoping review. To be eligible for inclusion, studies must report on adults ( $\geq 18$  years of age) with one of the Public Health Agency of Canada chronic conditions or HIV/AIDS. We will limit our review to peer support interventions delivered through on-one-one, on-line formats. All study designs will be included. Only studies published from 2012-onwards will be included to ensure relevance to the current healthcare context and feasibility. Furthermore, only English-language studies will be included. Studies will be identified by searching a variety of databases. Two reviewers will independently screen the titles and abstracts identified by the literature search for inclusion (i.e., level 1 screening), the full text articles (i.e., level 2 screening), and then perform data abstraction. Abstracted data will include study characteristics, participant population, key characteristics of the intervention, and outcomes collected.

### Dissemination:

This scoping review will identify the key features of online peer support interventions. Results will be used specifically to develop an online, peer support program. Future research may also involve a systematic review on the features of effective on-line peer support interventions.

### Strengths and limitations of this study:

This review is guided by known methodological frameworks.

All phases of the review will be conducted in duplicate.

This review will include the Public Health Agency of Canada definition/list of chronic conditions.

This review will not include mental health conditions and a variety of other disabilities.

This review will be limited to English language studies only.

**Keywords:** Peer support interventions, on-line, chronic conditions, scoping review, protocol

## Introduction

More than 20% Canadian adults live with one of the following chronic diseases: cardiovascular diseases, cancer, chronic respiratory diseases, or diabetes.<sup>1</sup> Since 2000, the prevalence rates for cardiovascular diseases and chronic respiratory diseases have increased.<sup>1</sup> Treatment of chronic diseases consumes 67% of all direct health care costs, and cost the Canadian economy \$190 billion annually, with \$68 billion related to treatment costs and the remaining costs related to lost productivity.<sup>2</sup> In the US, approximately 25% of the population has multiple chronic conditions;<sup>3</sup> among Americans aged 65 and older, approximately three in four have multiple chronic conditions.<sup>4</sup> In Australia, more than 7 million people have at least one chronic condition.<sup>5</sup> Thus, it is imperative to develop and implement effective interventions to manage these chronic conditions.

As result of this increasing burden, particularly in health services and related costs, individuals with chronic conditions need assistance in learning and maintaining self-care behaviours that support healthy living, referred to as “chronic disease self-management”.<sup>6-8</sup> Chronic condition self-management refers to a person’s ability to manage the symptoms, treatment, and physical, psychosocial and lifestyle changes that are associated with living with a chronic condition.<sup>7,8</sup> A promising intervention is peer support which is receiving increasing attention as both an effective and cost effective intervention method to support the self-management of chronic health conditions.<sup>6</sup>

There is some emerging evidence demonstrating the effectiveness of peer support for individuals with chronic conditions to self-manage their conditions.<sup>7-10</sup> Peer support refers to “support for a person with a chronic condition from someone with the same condition or similar circumstances”.<sup>6,11</sup> Individuals who provide peer support offer three types of support based on



1  
2  
3 experiential knowledge: emotional, informational and appraisal.<sup>12</sup> Emotional support involves  
4 caring, empathy and encouragement; informational support involves advice, suggestions with  
5 alternative actions, and factual feedback relevant to a particular topic; and appraisal support  
6 involves affirming feelings, thoughts, and behaviors and thus is motivational, encouraging the  
7 individual to continue with problem-solving attempts despite setbacks.<sup>12</sup>  
8  
9

10  
11  
12  
13  
14  
15  
16  
17  
18  
19  
20  
21  
22  
23  
24  
25  
26  
27  
28  
29  
30  
31  
32  
33  
34  
35  
36  
37  
38  
39  
40  
41  
42  
43  
44  
45  
46  
47  
48  
49  
50  
51  
52  
53  
54  
55  
56  
57  
58  
59  
60

There are seven predominant types of peer support models in chronic condition management: professional-led groups that encourage peer interactions, structured peer-led self-management training, peer coaches, community health workers, support groups, telephone-based peer support, and web- and email-based programs.<sup>6</sup> At the same time, it is also important to recognize that there are varied models of peer support, and that treating them as if they are fully defined and highly distinct may lead to overlooking important commonalities.<sup>13</sup> The current review will focus on peer coaches and web- and email-based programs. Given that 80% of Canadian households have the internet,<sup>14</sup> and the increasing use of web-based interventions, there is an increasing need to determine the characteristics of on-line peer support interventions.<sup>6,11</sup> The specific research question of this scoping review is the following: What is known from the existing literature about the key characteristics (e.g., duration, frequency, delivery setting, type of intervention, type of support provided - emotional, informational and appraisal, underlying theories for the intervention/behaviour change techniques/working mechanisms, context etc.) of on-line peer support interventions for adults with chronic conditions?

## 51 **Methods and analysis**

52  
53  
54  
55  
56  
57  
58  
59  
60

We will use the methodological frameworks proposed by Arksey and O'Malley<sup>15</sup> as well as Levac and colleagues<sup>16</sup> for the current scoping review. These frameworks outline six different

1  
2  
3 stages involved in a scoping review: (1) identifying the research question; (2) identifying  
4 relevant studies; (3) selecting studies; (4) charting the data; (5) collating, summarising and  
5 reporting the results; and, (6) consulting with relevant stakeholders.<sup>15,16</sup> The research team has  
6 expertise in peer support across chronic conditions (SEPM, JS, SA, SNS, MLAN, SJTG, SBJ),  
7 online interventions (SA, SM, SBJ), and knowledge synthesis methods (SEPM, LP, JRT,  
8 MLAN, SJTG, SBJ). Although traditionally applied to systematic review protocols, the  
9 Preferred Reporting Items for Systematic Reviews and Meta-analysis for Protocols (PRISMA-  
10 P)<sup>17</sup> was used to draft this protocol.  
11  
12  
13  
14  
15  
16  
17  
18  
19  
20  
21

### 22 *Eligibility criteria*

23  
24 For the purpose of this review, we will include chronic diseases identified by the Public  
25 Health Agency of Canada (PHAC), including cancer, heart (cardiovascular disease),  
26 hypertension, stroke, chronic respiratory diseases (asthma, chronic obstructive pulmonary  
27 disease, sleep apnea), diabetes, inflammatory bowel diseases (Crohn's Disease, ulcerative colitis)  
28 multiple sclerosis, neurological conditions (e.g., Alzheimer's disease and other dementias,  
29 cerebral palsy, epilepsy, multiple sclerosis, Parkinson's disease/parkinsonism, traumatic brain  
30 injury, and traumatic spinal cord injury (SCI)), arthritis, and osteoporosis.<sup>18</sup> Mental illness was  
31 excluded from the list given that peer support interventions for this group may have particularly  
32 unique features not generalizable to other chronic disease patient populations. Similarly, in a  
33 systematic review on the effectiveness of quality improvement strategies (i.e., including patient  
34 education and promotion of self-management) for coordination of care to reduce use of health  
35 care services, Tricco and colleagues<sup>19</sup> determined that these quality improvement strategies  
36 reduced hospital admissions among patients with chronic conditions other than mental illness,  
37 indicating that different approaches are needed for mental health. To this list, we have also  
38  
39  
40  
41  
42  
43  
44  
45  
46  
47  
48  
49  
50  
51  
52  
53  
54  
55  
56  
57  
58  
59  
60

1  
2  
3 included HIV/AIDS (which, from our preliminary research, has a significant amount of literature  
4 on peer support interventions,<sup>20</sup> and is increasingly being viewed as a chronic condition).

5  
6  
7  
8 Studies including individuals with co-morbidities (including mental illness) will be accepted.

9  
10 Thus, to be eligible for inclusion, the studies must report on adults ( $\geq 18$  years of age) with one of  
11 these PHAC chronic conditions (excluding mental illness) or HIV/AIDS. We will limit our  
12 review to peer support intervention delivered through on-line formats. These on-line  
13 interventions could include Skype-based discussions or social media peer interactions, for  
14 example. Therefore, interventions that are professional-led groups that encourage face-to-face  
15 peer interactions, involve community health workers who are not peers (i.e., health care  
16 professionals), support groups, and provide telephone-based peer support will be excluded. All  
17 study designs will be included (e.g., observational studies, randomized controlled trials and  
18 qualitative studies). Only studies published from January 2012-April 2017 will be included. We  
19 have included studies from the last 5 years to ensure relevance to the current healthcare context,  
20 in technology, and feasibility. Furthermore, only English-language studies will be included,  
21 which may result in a predisposition in results towards English language speaking countries.

### 22 23 24 25 26 27 28 29 30 31 32 33 34 35 36 37 38 39 ***Search strategy and information sources***

40  
41 Literature search strategies will be developed using medical subject headings (MeSH)  
42 and text words related to chronic conditions and peer support interventions. Studies will be  
43 identified by searching Medline (OVID interface), CINAHL (EBSCO interface), EMBASE  
44 (OVID interface), PsycInfo (OVID interface), and Cochrane Central Register Controlled Trials  
45 (Cochrane Library) and PEDro (physiotherapy evidence database). The search strategy for  
46 Medline can be found in Additional File 1. A hand search of the reference lists from reviews and  
47 selected articles will be made to ensure literature saturation. Finally, experts in the field of peer  
48  
49  
50  
51  
52  
53  
54  
55  
56  
57  
58  
59  
60

1  
2  
3 support will be contacted and consulted in order to ensure that all relevant data is obtained,  
4  
5 including members of the research team. An information specialist (LP) who is expert in  
6  
7 systematic and scoping reviews will conduct all of the literature searches.  
8  
9

### 10 ***Study selection***

11  
12 To promote the reliability of screening by the two reviewers, a pilot test of the level 1  
13  
14 screening form based on the criteria outlined above will be conducted on a random sample of  
15  
16 approximately 100 articles. The  $\kappa$  statistic will then be calculated to determine the inter-rater  
17  
18 reliability for study inclusion.<sup>21</sup> If low agreement is observed, the inclusion and exclusion  
19  
20 criteria will be simplified to increase the consistent application of the selection criteria. Two  
21  
22 reviewers will independently screen the titles and abstracts identified by the literature search for  
23  
24 inclusion using the screening form (i.e., level 1 screening). The full text of potentially relevant  
25  
26 articles will then be collected and screened to determine final inclusion (i.e., level 2 screening).  
27  
28 A pilot test of the level 2 screening form will be performed on approximately 1% of the articles  
29  
30 and the inter-rater reliability for study inclusion will also be calculated.<sup>21</sup> A third reviewer who  
31  
32 is knowledgeable in the research area will be available to resolve discrepancies, if necessary.  
33  
34  
35  
36  
37  
38

### 39 ***Data items and data collection process***

40  
41 Abstracted data will include study characteristics (e.g., year of publication, country of  
42  
43 study), participant population (e.g., chronic disease condition, income, ethnicity, age, sex,  
44  
45 education), key characteristics of the intervention (e.g., duration, frequency, delivery setting,  
46  
47 type of intervention, type of support provided - emotional, informational and appraisal,  
48  
49 underlying theories for the intervention/behaviour change techniques/working mechanisms,  
50  
51 context etc.), and type of outcome collected (if applicable) as well as results (i.e., efficacy or  
52  
53 effectiveness). Outcomes reported may include, but are not limited to, self-efficacy, depression,  
54  
55  
56  
57  
58  
59  
60

1  
2  
3 and quality of life. In fact, we aim to identify the variety of reported impacts. Additional  
4  
5 categories may be identified through the completion of the search and through discussions with  
6  
7 the research team and key stakeholders. A data abstraction form will also be pilot tested and  
8  
9 modified if poor agreement is observed. For example, any wording on the form that may be  
10  
11 related to poor agreement will be reviewed and changed. Two reviewers will independently  
12  
13 abstract all of the data and a discussion or the involvement of a third reviewer will resolve  
14  
15 disagreements. Study quality will not be evaluated as the purpose of a scoping review is to  
16  
17 identify gaps in the literature and future areas for a systematic review.<sup>15,16</sup> Distiller SR will be  
18  
19 used to manage the records and data throughout the review.  
20  
21  
22  
23

### 24 ***Synthesis***

25  
26  
27 The data from this scoping review will be summarized quantitatively using numerical  
28  
29 counts and qualitatively using thematic analysis and will be grouped by chronic condition type  
30  
31 (e.g., what kind of underlying theories are found in on-line peer support interventions in cancer?)  
32  
33 This data will be coded/analyzed manually. The results of this review will determine the key  
34  
35 characteristics (e.g., duration, frequency, delivery setting, type of intervention, type of support  
36  
37 provided - emotional, informational and appraisal, underlying theories for the  
38  
39 intervention/behaviour change techniques/working mechanisms, context etc.) of on-line peer  
40  
41 support interventions for adults with chronic conditions. This scoping review will identify gaps  
42  
43 in the literature as well as future areas for study either via implementation studies, consensus  
44  
45 meeting, or systematic review.  
46  
47  
48  
49

### 50 **Dissemination**

51  
52  
53 Knowledge translation activities will occur at the beginning of the review and continue  
54  
55 throughout with dissemination of the research question to key stakeholders such as the Ontario  
56  
57  
58  
59  
60

1  
2  
3 Ministry of Health and Long-term Care, the Ontario Peer Development Initiative, March of  
4 Dimes Canada, SCI Canada, Rick Hansen Institute, and the Ontario Neurotrauma Foundation.  
5  
6 End-of-grant knowledge translation could also take place through these organizations and their  
7  
8 outlets (e.g., print and online newsletters) as well as through traditional knowledge translation  
9  
10 mechanisms (e.g., peer-reviewed journals and conference). For example, the results of the  
11  
12 scoping review will be presented at meetings locally, nationally, and internationally (e.g.,  
13  
14 National Conference on Peer Support, American Medical Informatics Association) and published  
15  
16 in a peer-reviewed journal so that results are available to the appropriate academic and clinical  
17  
18 audiences. Finally, partnerships with local clinical programs and/or research initiatives will be  
19  
20 made so that the results are disseminated in a timely and effective manner. There will be  
21  
22 expected limitations to this review. For example, this review will not include (primary) mental  
23  
24 health conditions and a variety of other disabilities. Furthermore, this review will be limited to  
25  
26 English language studies only. Lastly, our review will be limited to the published research  
27  
28 literature. We acknowledge that we will be excluding reports on available, relevant programs  
29  
30 but not published in these arenas. However, the currently proposed scoping review has a number  
31  
32 of strengths - it is guided by known methodological frameworks and all phases will be conducted  
33  
34 in duplicate, etc). This review will identify the key features of peer support interventions and  
35  
36 will be used specifically to inform the development of an online, peer support program (i.e.,  
37  
38 online peer support program for individuals with SCI). Depending on the evidence base found,  
39  
40 future research may also involve a systematic review on the features of effective on-line peer  
41  
42 support interventions.  
43  
44  
45  
46  
47  
48  
49  
50  
51  
52  
53  
54  
55  
56  
57  
58  
59  
60

## Footnotes

**Contributors:** SEPM conceived of the scoping review, together with JS, LP and SBJ. SEPM wrote the first draft of the protocol. SEPM is the guarantor of the review. SEPM, JS, and LP were involved in the preliminary literature review. LP conducted the literature search. LP provided methodological expertise (knowledge synthesis). JS, SA, SNS, JRT, SJTG, and MLAN provided critical content expertise on peer support that was integrated into the current protocol. SEPM, JS, LP, SA, SNS, JRT, MLAN, SJTG, SH, and SBJ were involved in editing and revising the protocol for important intellectual content. SEPM, JS, LP, SA, SNS, JRT, MLAN, SJTG, SH, and SBJ approved the final version of the protocol.

**Funding:** This work was supported by the Ontario Neurotrauma Foundation (ONF) and the Rick Hansen Institute (RHI). The ONF and RHI had no role in developing this protocol. SEP Munce is/has been supported by a Heart and Stroke Foundation of Canada Focus on Stroke Fellowship, Toronto Rehabilitation Institute-University Health Network, Canadian Institutes of Health Research Fellowship, and a European Stroke Research Foundation Investigator Award. SNS is supported by a salary award from FRQS Chercheurs-Boursiers, Junior 1 program.

**Competing interests:** None.

**Provenance and peer review:** Not commissioned; externally peer reviewed.

## References

1. Public Health Agency of Canada. How healthy are Canadians? A trend analysis of the health of Canadians from a healthy living and chronic disease perspective. Ottawa, ON: Public Health Agency of Canada, 2016.
2. Elmslie, K. Against the growing burden of disease. Ottawa, ON: Public Health Agency of Canada, 2016.
3. US Department of Health and Human Services. Multiple chronic conditions – a strategic framework: optimum health and quality of life for individuals with multiple chronic conditions. Washington, DC: US Department of Health and Human Services, 2010.
4. Gerteis J, Izrael D, Deitz D, et al. Multiple chronic conditions chartbook. Rockville, MD: Agency for Healthcare Research and Quality, 2014.
5. Australian Institute of Health and Welfare. Authoritative information and statistics to promote better health and well-being: chronic diseases. <http://www.aihw.gov.au/chronic-diseases/>
6. Heisler M. Overview of peer support models to improve diabetes self-management and clinical outcomes. *Diabetes Spectrum* 2007; 20:214-223.
7. de Silva D. Helping people help themselves: a review of the evidence considering whether or not it is worthwhile to support self-management. London, UK: The Health Foundation, 2011.
8. Health Council of Canada. Self-management support for Canadians with chronic conditions: a focus for primary care. [http://www.healthcouncilcanada.ca/rpt\\_det.php?id=372](http://www.healthcouncilcanada.ca/rpt_det.php?id=372)
9. Cook JA, Copeland ME, Corey L, et al. Developing the evidence base for peer-led services: changes among participants following Wellness Recovery Action Planning (WRAP) Education in two statewide initiatives. *Psychiatr Rehabil J* 2010;34:113-20.
10. Chronic Illness Alliance. Peer support for chronic and complex conditions: a literature review. <http://www.chronicillness.org.au/>
11. Lauckner HM, Hutchinson SL. Peer support for people with chronic conditions in rural areas: a scoping review. *Rural Remote Health* 2016; 16:3601.
12. Dennis C. Peer support within a health care context: a concept analysis. *Int J Nurs Stud* 2003; 40:321-32.
13. Eng E, Parker E, Harlan C. Lay health adviser intervention strategies: a continuum, from natural helping to paraprofessional helping. *Health Educ Behav* 1997; 24:413-417.
14. Statistics Canada. Internet in 4 out of 5 households. Ottawa, ON: Statistics Canada, 2010.



15. Arksey H, O'Malley L. Scoping studies: towards a methodological framework. *Int J Soc Res Methodol* 2005; 8:19-32
16. Levac DC, Colquhoun H, O'Brien KK. Scoping studies: advancing the methodology. *Implement Sci* 2010; 5:69.
17. Shamseer L, Moher D, Clarke M et al. Preferred reporting items for systematic review and meta-analysis protocols (PRISMA-P) 2015: elaboration and explanation. *BMJ* 2015; 349.
18. Public Health Agency of Canada. Chronic diseases. <http://www.phac-aspc.gc.ca/cd-mc/index-eng.php>
19. Tricco AC, Antony J, Ivers NM, et al. Effectiveness of quality improvement strategies for coordination of care to reduce use of health care services: a systematic review and meta-analysis. *CMAJ* 2014; 186:E568-78.
20. Prestage G, Brown G, Allan B, et al. Impact of peer support on behaviour change among newly diagnosed Australian gay men. *J Acquir Immune Defic Syndr* 2016; 72:565-71.
21. Landis JR, Koch GG. The measurement of observer agreement for categorical data. *Biometrics* 1977; 33:159-74.

Database: Ovid MEDLINE: Epub Ahead of Print, In-Process & Other Non-Indexed Citations, Ovid MEDLINE® Daily and Ovid MEDLINE® <1946-Present>

Search Strategy:

---

- 1 Diabetes Mellitus/ [ Diabetes Mellitus ] (106925)
- 2 Diabetes Mellitus, Type 1/ (69361)
- 3 Diabetes Mellitus, Type 2/ (108663)
- 4 Diabetes Complications/ (39462)
- 5 diabet\$.tw. (523081)
- 6 (insulin\$ adj depend\$).tw. (29179)
- 7 insulin?depend\$.tw. (43)
- 8 exp Pulmonary Disease, Chronic Obstructive/ [ COPD ] (46140)
- 9 COPD.tw. (35401)
- 10 COAD.tw. (245)
- 11 "chronic airflow obstruction".tw. (543)
- 12 "obstructive lung disease\$.tw. (6025)
- 13 "obstructive pulmonary disease\$.tw. (38490)
- 14 Cardiovascular Diseases/ [ Cardiovascular Disease/Stroke/Hypertension ] (126070)
- 15 Cerebrovascular Disorders/ (45398)
- 16 exp Heart Diseases/ (1028587)
- 17 exp Hypertension/ (238378)
- 18 exp Hyperlipidemias/ (62478)
- 19 exp Stroke/ (107275)
- 20 (cardiovascular adj disease?).tw. (132985)
- 21 (cardio-vascular adj disease?).tw. (566)
- 22 (cardiac adj arrest\$).tw. (27050)
- 23 (coronary adj disease\$).tw. (13690)
- 24 cerebrovasc\$.tw. (45920)
- 25 (cerebral adj vasc\$).tw. (7701)
- 26 (heart adj failure).tw. (136198)
- 27 (heart adj disease\$).tw. (148046)
- 28 (heart adj attack\$).tw. (4829)
- 29 "high blood pressure".tw. (12751)
- 30 hypertensi\$.tw. (380148)
- 31 hyperlipid\$.tw. (26714)
- 32 hypercholesterol\$.tw. (31280)
- 33 poststroke.tw. (3944)

1  
2  
3  
4 34 post-stroke.tw. (6330)  
5 35 stroke.tw. (191278)  
6 36 exp Carcinoma/ [ Cancer ] (575751)  
7 37 exp Neoplasms/ (2988852)  
8 38 carcinoma\$.tw. (574831)  
9 39 neoplasm\$.tw. (119477)  
10 40 tumor\$.tw. (1441627)  
11 41 cancer\$.tw. (1434821)  
12 42 exp Osteoporosis/ [ Osteoporosis ] (50872)  
13 43 osteoporosis.tw. (56120)  
14 44 exp Arthritis/ [ Arthritis ] (235024)  
15 45 arthriti\$.tw. (158150)  
16 46 osteoarthriti\$.tw. (51431)  
17 47 osteo-arthriti\$.tw. (404)  
18 48 rheumati\$.tw. (49733)  
19 49 exp Asthma/ [ Asthma ] (117410)  
20 50 asthma\$.tw. (138598)  
21 51 exp Inflammatory Bowel Diseases/ [ IBD ] (69727)  
22 52 "inflammatory bowel disease?".tw. (36528)  
23 53 IBD.tw. (17629)  
24 54 (ulcer\$ adj colit\$).tw. (32683)  
25 55 crohn\$.tw. (39743)  
26 56 Motor Neuron Disease/ [ Neurological Conditions ] (4006)  
27 57 "motor neuron disease?".tw. (4361)  
28 58 (motorneuron adj disease).tw. (15)  
29 59 (motoneuron adj disease).tw. (267)  
30 60 Multiple Sclerosis/ [ MS ] (46517)  
31 61 Multiple Sclerosis, Chronic Progressive/ (1723)  
32 62 Multiple Sclerosis, Relapsing-Remitting/ (4962)  
33 63 (multiple adj sclerosis).tw. (62635)  
34 64 exp Spinal Cord Injuries/ [ SCI ] (43135)  
35 65 exp Paraplegia/ (12583)  
36 66 exp Quadriplegia/ (7638)  
37 67 paraplegi\$.tw. (14828)  
38 68 quadriplegi\$.tw. (3836)  
39 69 tetraplegi\$.tw. (3762)  
40 70 ("spinal cord" adj injur\$).tw. (31617)  
41  
42  
43  
44  
45  
46  
47  
48  
49  
50  
51  
52  
53  
54  
55  
56  
57  
58  
59  
60

1  
2  
3  
4 71 ("spinal cord" adj trauma\$.tw. (881)  
5 72 SCI.tw. (28016)  
6 73 exp Sleep Apnea Syndromes/ [ Sleep Apnea ] (29614)  
7 74 (sleep adj apn?ea?).tw. (29165)  
8 75 exp HIV/ [ HIV/AIDS ] (90847)  
9 76 Acquired Immunodeficiency Syndrome/ (76092)  
10 77 AIDS.tw. (137756)  
11 78 HIV.tw. (275603)  
12 79 (human adj immunodeficiency).tw. (80198)  
13 80 "acquired immunodeficiency syndrome".tw. (15520)  
14 81 "acquired immune deficiency syndrome".tw. (5532)  
15 82 or/1-81 (6864407)  
16 83 Peer Group/ [ Peer Support ] (17371)  
17 84 Volunteers/ (8787)  
18 85 peer.tw. (47864)  
19 86 peers.tw. (23571)  
20 87 volunteer?.tw. (166313)  
21 88 advice.tw. (40431)  
22 89 advis\$.tw. (58943)  
23 90 (health adj coach\$.tw. (456)  
24 91 counsel\$.tw. (89121)  
25 92 (lay\$ adj led).tw. (121)  
26 93 (lay\$ adj run).tw. (12)  
27 94 (lay\$ adj help\$.tw. (91)  
28 95 (lay\$ adj support\$.tw. (288)  
29 96 (lay\$ adj visit\$.tw. (11)  
30 97 (lay\$ adj based).tw. (514)  
31 98 (lay\$ adj deliver\$.tw. (19)  
32 99 (user\$ adj led).tw. (102)  
33 100 (user\$ adj run).tw. (15)  
34 101 (user\$ adj based).tw. (363)  
35 102 layperson\$.tw. (1198)  
36 103 (lay adj person\$.tw. (666)  
37 104 (community adj person\$.tw. (78)  
38 105 (support adj person\$.tw. (1127)  
39 106 (community adj based).tw. (48065)  
40 107 (community adj visit\$.tw. (64)  
41  
42  
43  
44  
45  
46  
47  
48  
49  
50  
51  
52  
53  
54  
55  
56  
57  
58  
59  
60

- 1  
2  
3  
4 108 (home adj based).tw. (7657)  
5 109 (home adj visit\$.tw. (7270)  
6 110 (expert adj patient?).tw. (207)  
7  
8 111 (non adj professional?).tw. (1234)  
9 112 nonprofessional?.tw. (1057)  
10 113 (non adj medical).tw. (4572)  
11 114 nonmedical.tw. (3177)  
12 115 (mutual adj aid).tw. (323)  
13 116 (mutual adj support?).tw. (510)  
14 117 (supportive adj relationship).tw. (152)  
15 118 mentor\$.tw. (11672)  
16  
17 119 (community adj worker?).tw. (368)  
18 120 (lay adj worker?).tw. (84)  
19 121 (support adj worker?).tw. (663)  
20 122 (voluntary adj work\$.tw. (251)  
21 123 (voluntary adj care).tw. (33)  
22 124 (voluntary adj involvement).tw. (19)  
23 125 (voluntary adj help\$.tw. (43)  
24 126 (voluntary adj counsel\$.tw. (1052)  
25 127 or/83-126 (498143)  
26 128 Computer-Assisted Instruction/ (11051)  
27 129 exp Internet/ (64547)  
28 130 exp Software/ (133078)  
29 131 Mobile Applications/ (1899)  
30 132 User-Computer Interface/ (33561)  
31 133 Web Browser/ (384)  
32 134 Computers/ (50698)  
33 135 exp Microcomputers/ (18257)  
34 136 exp Cell Phones/ (8858)  
35 137 Educational Technology/ (1342)  
36 138 Electronic Mail/ (2366)  
37 139 Webcasts/ (449)  
38 140 exp Videoconferencing/ (1436)  
39 141 chatroom\$.tw. (49)  
40 142 (chat adj room\$.tw. (275)  
41 143 email\$.tw. (5122)  
42 144 e-mail\$.tw. (6846)  
43  
44  
45  
46  
47  
48  
49  
50  
51  
52  
53  
54  
55  
56  
57  
58  
59  
60

1  
2  
3  
4 145 (web adj based).tw. (22206)  
5 146 (computer adj based).tw. (12251)  
6  
7 147 online.tw. (70773)  
8 148 (computer adj mediated).tw. (447)  
9  
10 149 virtual.tw. (43005)  
11 150 (computer adj assisted).tw. (22697)  
12  
13 151 Internet.mp. (83576)  
14 152 (computer adj supported).tw. (425)  
15 153 (hand adj held).tw. (5605)  
16  
17 154 "personal digital assistant?".tw. (990)  
18 155 ebased.tw. (0)  
19  
20 156 e-based.tw. (227)  
21 157 on-line.tw. (23870)  
22  
23 158 computer\$.tw. (268656)  
24 159 (information adj technolog\$.tw. (10318)  
25  
26 160 website\$.tw. (18794)  
27 161 web-site\$.tw. (7251)  
28  
29 162 e-health.tw. (1569)  
30 163 ehealth.tw. (1427)  
31  
32 164 (electronic adj health).tw. (9090)  
33 165 (mobile adj phone\$.tw. (5367)  
34 166 (cell adj phone\$.tw. (1928)  
35 167 smartphone\$.tw. (4315)  
36 168 smart-phone\$.tw. (677)  
37 169 (mobile adj app\$.tw. (1447)  
38 170 or/128-169 (626750)  
39 171 exp adult/ [ Adult filter - validated ] (6417105)  
40 172 adult.mp. (5014578)  
41 173 Middle Aged/ (3849721)  
42 174 age\$.tw. (3111391)  
43 175 or/171-174 (8450657)  
44 176 82 and 127 and 170 and 175 (3766)  
45 177 exp Animals/ not (exp Animals/ and Humans/) (4384144)  
46 178 176 not 177 (3764)  
47 179 limit 178 to (english language and yr="2007 -Current") (2628)  
48  
49  
50  
51  
52  
53  
54  
55  
56  
57  
58  
59  
60

\*\*\*\*\*

**PRISMA-P (Preferred Reporting Items for Systematic review and Meta-Analysis Protocols) 2015 checklist: recommended items to address in a systematic review protocol\* - NOTE that the current manuscript is a **scoping review protocol****

| Section and topic                 | Item No | Checklist item                                                                                                                                                                                                                              |
|-----------------------------------|---------|---------------------------------------------------------------------------------------------------------------------------------------------------------------------------------------------------------------------------------------------|
| <b>ADMINISTRATIVE INFORMATION</b> |         |                                                                                                                                                                                                                                             |
| Title:                            |         |                                                                                                                                                                                                                                             |
| Identification                    | 1a      | Identify the report as a protocol of a systematic review <b>page 1</b>                                                                                                                                                                      |
| Update                            | 1b      | If the protocol is for an update of a previous systematic review, identify as such <b>N/A</b> .                                                                                                                                             |
| Registration                      | 2       | If registered, provide the name of the registry (such as PROSPERO) and registration number <b>N/A as this is a scoping review.</b>                                                                                                          |
| Authors:                          |         |                                                                                                                                                                                                                                             |
| Contact                           | 3a      | Provide name, institutional affiliation, e-mail address of all protocol authors; provide physical mailing address of corresponding author <b>page 1</b>                                                                                     |
| Contributions                     | 3b      | Describe contributions of protocol authors and identify the guarantor of the review <b>page 9</b>                                                                                                                                           |
| Amendments                        | 4       | If the protocol represents an amendment of a previously completed or published protocol, identify as such and list changes; otherwise, state plan for documenting important protocol amendments <b>N/A</b>                                  |
| Support:                          |         |                                                                                                                                                                                                                                             |
| Sources                           | 5a      | Indicate sources of financial or other support for the review <b>page 9</b>                                                                                                                                                                 |
| Sponsor                           | 5b      | Provide name for the review funder and/or sponsor <b>page 9</b>                                                                                                                                                                             |
| Role of sponsor or funder         | 5c      | Describe roles of funder(s), sponsor(s), and/or institution(s), if any, in developing the protocol <b>page 9</b>                                                                                                                            |
| <b>INTRODUCTION</b>               |         |                                                                                                                                                                                                                                             |
| Rationale                         | 6       | Describe the rationale for the review in the context of what is already known <b>pages 3-4</b>                                                                                                                                              |
| Objectives                        | 7       | Provide an explicit statement of the question(s) the review will address with reference to participants, interventions, comparators, and outcomes (PICO) <b>page 4</b>                                                                      |
| <b>METHODS</b>                    |         |                                                                                                                                                                                                                                             |
| Eligibility criteria              | 8       | Specify the study characteristics (such as PICO, study design, setting, time frame) and report characteristics (such as years considered, language, publication status) to be used as criteria for eligibility for the review <b>page 5</b> |
| Information sources               | 9       | Describe all intended information sources (such as electronic databases, contact with study authors, trial registers or other grey literature sources) with planned dates of coverage <b>page 6</b>                                         |
| Search strategy                   | 10      | Present draft of search strategy to be used for at least one electronic database, including planned limits, such that it could be repeated <b>Additional File 1</b>                                                                         |
| Study records:                    |         |                                                                                                                                                                                                                                             |

|                                    |     |                                                                                                                                                                                                                                                              |
|------------------------------------|-----|--------------------------------------------------------------------------------------------------------------------------------------------------------------------------------------------------------------------------------------------------------------|
| Data management                    | 11a | Describe the mechanism(s) that will be used to manage records and data throughout the review <b>page 7</b>                                                                                                                                                   |
| Selection process                  | 11b | State the process that will be used for selecting studies (such as two independent reviewers) through each phase of the review (that is, screening, eligibility and inclusion in meta-analysis) <b>pages 6-7</b>                                             |
| Data collection process            | 11c | Describe planned method of extracting data from reports (such as piloting forms, done independently, in duplicate), any processes for obtaining and confirming data from investigators <b>page 7</b>                                                         |
| Data items                         | 12  | List and define all variables for which data will be sought (such as PICO items, funding sources), any pre-planned data assumptions and simplifications <b>pages 7-8 (data abstraction)</b>                                                                  |
| Outcomes and prioritization        | 13  | List and define all outcomes for which data will be sought, including prioritization of main and additional outcomes, with rationale <b>pages 7-8 (data abstraction)</b>                                                                                     |
| Risk of bias in individual studies | 14  | Describe anticipated methods for assessing risk of bias of individual studies, including whether this will be done at the outcome or study level, or both; state how this information will be used in data synthesis <b>N/A as this is a scoping review.</b> |
| Data synthesis                     | 15a | Describe criteria under which study data will be quantitatively synthesised <b>page 7</b>                                                                                                                                                                    |
|                                    | 15b | If data are appropriate for quantitative synthesis, describe planned summary measures, methods of handling data and methods of combining data from studies, including any planned exploration of consistency (such as $I^2$ , Kendall's $\tau$ ) <b>N/A</b>  |
|                                    | 15c | Describe any proposed additional analyses (such as sensitivity or subgroup analyses, meta-regression) <b>N/A</b>                                                                                                                                             |
|                                    | 15d | If quantitative synthesis is not appropriate, describe the type of summary planned <b>N/A</b>                                                                                                                                                                |
| Meta-bias(es)                      | 16  | Specify any planned assessment of meta-bias(es) (such as publication bias across studies, selective reporting within studies) <b>N/A as this is a scoping review.</b>                                                                                        |
| Confidence in cumulative evidence  | 17  | Describe how the strength of the body of evidence will be assessed (such as GRADE) <b>N/A as this is a scoping review.</b>                                                                                                                                   |

**\* It is strongly recommended that this checklist be read in conjunction with the PRISMA-P Explanation and Elaboration (cite when available) for important clarification on the items. Amendments to a review protocol should be tracked and dated. The copyright for PRISMA-P (including checklist) is held by the PRISMA-P Group and is distributed under a Creative Commons Attribution Licence 4.0.**

*From: Shamseer L, Moher D, Clarke M, Ghersi D, Liberati A, Petticrew M, Shekelle P, Stewart L, PRISMA-P Group. Preferred reporting items for systematic review and meta-analysis protocols (PRISMA-P) 2015: elaboration and explanation. BMJ. 2015 Jan 2;349(jan02 1):g7647.*



# BMJ Open

## Online peer support interventions for chronic conditions: A scoping review protocol

|                                 |                                                                                                                                                                                                                                                                                                                                                                                                                                                                                                                                                                                                                                                                                                                     |
|---------------------------------|---------------------------------------------------------------------------------------------------------------------------------------------------------------------------------------------------------------------------------------------------------------------------------------------------------------------------------------------------------------------------------------------------------------------------------------------------------------------------------------------------------------------------------------------------------------------------------------------------------------------------------------------------------------------------------------------------------------------|
| Journal:                        | <i>BMJ Open</i>                                                                                                                                                                                                                                                                                                                                                                                                                                                                                                                                                                                                                                                                                                     |
| Manuscript ID                   | bmjopen-2017-017999.R2                                                                                                                                                                                                                                                                                                                                                                                                                                                                                                                                                                                                                                                                                              |
| Article Type:                   | Protocol                                                                                                                                                                                                                                                                                                                                                                                                                                                                                                                                                                                                                                                                                                            |
| Date Submitted by the Author:   | 24-Aug-2017                                                                                                                                                                                                                                                                                                                                                                                                                                                                                                                                                                                                                                                                                                         |
| Complete List of Authors:       | Munce, Sarah; Toronto Rehabilitation Institute, Brain and Spinal Cord Rehabilitation<br>Shepherd, John; University of Toronto, Rehabilitation Sciences Institute<br>Perrier, Laure; University of Toronto, Gerstein Science Information Centre<br>Allin, Sonya; University of Toronto, Physical Therapy<br>Sweet, Shane; McGill University<br>Tomasone, Jennifer; Queen's University, School of Kinesiology and Health Studies<br>Nelson, Michelle; Lunenfeld-Tanenbaum Research Institute, Bridgepoint Collaboratory<br>Guilcher, Sara; University of Toronto, Leslie Dan Faculty of Pharmacy<br>Hossain, Saima; University of Toronto, Physical Therapy<br>Jaglal, Susan; University of Toronto, Physical Therapy |
| <b>Primary Subject Heading</b>: | Research methods                                                                                                                                                                                                                                                                                                                                                                                                                                                                                                                                                                                                                                                                                                    |
| Secondary Subject Heading:      | Evidence based practice, Health services research, Patient-centred medicine                                                                                                                                                                                                                                                                                                                                                                                                                                                                                                                                                                                                                                         |
| Keywords:                       | World Wide Web technology < BIOTECHNOLOGY & BIOINFORMATICS, HEALTH SERVICES ADMINISTRATION & MANAGEMENT, CARDIOLOGY, DIABETES & ENDOCRINOLOGY, ONCOLOGY                                                                                                                                                                                                                                                                                                                                                                                                                                                                                                                                                             |
|                                 |                                                                                                                                                                                                                                                                                                                                                                                                                                                                                                                                                                                                                                                                                                                     |

SCHOLARONE™  
Manuscripts

## Online peer support interventions for chronic conditions: A scoping review protocol

Sarah EP Munce PhD<sup>1</sup>; John Shepherd MBA<sup>2</sup>; Laure Perrier PhD MLIS<sup>3</sup>; Sonya Allin PhD<sup>4</sup>; Shane N Sweet, PhD<sup>5</sup>; Jennifer R Tomasone, PhD<sup>6</sup>; Michelle LA Nelson PhD<sup>7</sup>; Sara JT Guilcher PT, PhD<sup>8</sup>; Saima Hossain BSc<sup>3</sup>, Susan B Jaglal PhD<sup>1,2,4,9</sup>

<sup>1</sup>Toronto Rehabilitation Institute, University Health Network, Toronto, Ontario, Canada

<sup>2</sup>Rehabilitation Sciences Institute, University of Toronto, Toronto, Ontario, Canada

<sup>3</sup>Gerstein Science Information Centre, University of Toronto, Toronto, Ontario, Canada

<sup>4</sup>Department of Physical Therapy, University of Toronto, Toronto, Ontario, Canada

<sup>5</sup>Department of Kinesiology and Physical Education, McGill University, Montreal, Quebec, Canada, & Center for Interdisciplinary Research in Rehabilitation of Greater Montreal

<sup>6</sup>School of Kinesiology and Health Studies, Queen's University, Kingston, Ontario, Canada

<sup>7</sup>Bridgepoint Collaboratory; Lunenfeld-Tanenbaum Research Institute, Toronto, Ontario, Canada

<sup>8</sup>Leslie Dan Faculty of Pharmacy, University of Toronto, Toronto, Ontario, Canada

<sup>9</sup>Institute of Health Policy, Management, and Evaluation, University of Toronto, Toronto, Ontario, Canada

Sarah EP Munce; [sarah.munce@uhn.ca](mailto:sarah.munce@uhn.ca)

John Shepherd; [john.shepherd@mail.utoronto.ca](mailto:john.shepherd@mail.utoronto.ca)

Laure Perrier; [l.perrier@utoronto.ca](mailto:l.perrier@utoronto.ca)

Sonya Allin; [s.allin@utoronto.ca](mailto:s.allin@utoronto.ca)

Shane N Sweet; [shane.sweet@mcgill.ca](mailto:shane.sweet@mcgill.ca)

Jennifer R Tomasone; [tomasone@queensu.ca](mailto:tomasone@queensu.ca)

Michelle LA Nelson; [Michelle.Nelson@sinaihealthsystem.ca](mailto:Michelle.Nelson@sinaihealthsystem.ca)

Sara JT Guilcher; [sara.guilcher@utoronto.ca](mailto:sara.guilcher@utoronto.ca)

Saima Hossain; [hsaima7@gmail.com](mailto:hsaima7@gmail.com)

Susan B Jaglal; [susan.jaglal@utoronto.ca](mailto:susan.jaglal@utoronto.ca)

\*Corresponding Author:

Dr. Sarah Munce

Post-doctoral Fellow

Toronto Rehabilitation Institute-University Health Network

550 University Ave.

Toronto, Ontario, Canada M5G 2A2

Telephone: 416-946-7902

Fax: 416-597-7112

Email: [sarah.munce@mail.utoronto.ca](mailto:sarah.munce@mail.utoronto.ca)

## Abstract

### Introduction:

Peer support is receiving increasing attention as both an effective and cost effective intervention method to support the self-management of chronic health conditions. Given that an increasing proportion of Canadians have internet access and the increasing implementation of web-based interventions, on-line peer support interventions are a promising option to address the burden of chronic diseases. Thus, the specific research question of this scoping review is the following: *What is known from the existing literature about the key characteristics of on-line peer support interventions for adults with chronic conditions?*

### Methods and analysis:

We will use the methodological frameworks used by Arksey and O'Malley as well as Levac and colleagues for the current scoping review. To be eligible for inclusion, studies must report on adults ( $\geq 18$  years of age) with one of the Public Health Agency of Canada chronic conditions or HIV/AIDS. We will limit our review to peer support interventions delivered through on-line formats. All study designs will be included. Only studies published from 2012-onwards will be included to ensure relevance to the current healthcare context and feasibility. Furthermore, only English-language studies will be included. Studies will be identified by searching a variety of databases. Two reviewers will independently screen the titles and abstracts identified by the literature search for inclusion (i.e., level 1 screening), the full text articles (i.e., level 2 screening), and then perform data abstraction. Abstracted data will include study characteristics, participant population, key characteristics of the intervention, and outcomes collected.

### Dissemination:

This review will identify the key features of on-line peer support interventions and could assist in the future development of other on-line peer support programs so that effective and sustainable programs can be developed.

### Strengths and limitations of this study:

This review is guided by known methodological frameworks.

All phases of the review will be conducted in duplicate.

This review will include the Public Health Agency of Canada definition/list of chronic conditions.

This review will not include mental health conditions and a variety of other disabilities.

This review will be limited to English language studies only.

**Keywords:** Peer support interventions, on-line, chronic conditions, scoping review, protocol

## Introduction

More than 20% Canadian adults live with one of the following chronic diseases: cardiovascular diseases, cancer, chronic respiratory diseases, or diabetes.<sup>1</sup> Since 2000, the prevalence rates for cardiovascular diseases and chronic respiratory diseases have increased.<sup>1</sup> Treatment of chronic diseases consumes 67% of all direct health care costs, and cost the Canadian economy \$190 billion annually, with \$68 billion related to treatment costs and the remaining costs related to lost productivity.<sup>2</sup> In the US, approximately 25% of the population has multiple chronic conditions;<sup>3</sup> among Americans aged 65 and older, approximately three in four have multiple chronic conditions.<sup>4</sup> In Australia, more than 7 million people have at least one chronic condition.<sup>5</sup> Thus, it is imperative to develop and implement effective interventions to manage these chronic conditions.

As a result of this increasing burden, particularly in health services and related costs, individuals with chronic conditions need assistance in learning and maintaining self-care behaviours that support healthy living, referred to as “chronic disease self-management”.<sup>6-8</sup> Chronic condition self-management refers to a person’s ability to manage the symptoms, treatment, and physical, psychosocial and lifestyle changes that are associated with living with a chronic condition.<sup>7,8</sup> A promising intervention is peer support which is receiving increasing attention as both an effective and cost effective intervention method to support the self-management of chronic health conditions.<sup>6</sup>

There is some emerging evidence demonstrating the effectiveness of peer support for individuals with chronic conditions to self-manage their conditions.<sup>7-10</sup> Peer support in the context of chronic disease management refers to “support for a person with a chronic condition from someone with the same condition or similar circumstances”.<sup>6,11</sup> Individuals who provide

1  
2  
3 peer support offer three types of support based on experiential knowledge: emotional,  
4  
5 informational, and appraisal.<sup>12</sup> Emotional support involves caring, empathy and encouragement;  
6  
7 informational support involves advice, suggestions with alternative actions, and factual feedback  
8  
9 relevant to a particular topic; and appraisal support involves affirming feelings, thoughts, and  
10  
11 behaviors and thus is motivational, encouraging the individual to continue with problem-solving  
12  
13 attempts despite setbacks.<sup>12</sup>  
14  
15

16  
17 There are seven predominant types of peer support models in chronic condition  
18  
19 management: professional-led groups that encourage peer interactions, structured peer-led self-  
20  
21 management training, peer coaches, community health workers, support groups, telephone-based  
22  
23 peer support, and web- and email-based programs.<sup>6</sup> At the same time, it is also important to  
24  
25 recognize that there are varied models of peer support, and that treating them as if they are fully  
26  
27 defined and highly distinct may lead to overlooking important commonalities.<sup>13</sup> The current  
28  
29 review will focus on peer coaches and web- and email-based programs. Given that the majority  
30  
31 of households have the internet (e.g., 80% in Canada),<sup>14</sup> and the increasing use of web-based  
32  
33 interventions, there is an increasing need to determine the characteristics of on-line peer support  
34  
35 interventions.<sup>6,11</sup> The specific research question of this scoping review is the following: What is  
36  
37 known from the existing literature about the key characteristics (e.g., duration, frequency,  
38  
39 delivery setting, type of intervention, type of support provided - emotional, informational and  
40  
41 appraisal, underlying theories for the intervention/behaviour change techniques/working  
42  
43 mechanisms, context etc.) of on-line peer support interventions for adults with chronic  
44  
45 conditions?  
46  
47  
48  
49  
50  
51  
52  
53  
54  
55  
56  
57  
58  
59  
60

## Methods and analysis

We will use the methodological frameworks proposed by Arksey and O'Malley<sup>15</sup> as well as Levac and colleagues<sup>16</sup> for the current scoping review. These frameworks outline six different stages involved in a scoping review: (1) identifying the research question; (2) identifying relevant studies; (3) selecting studies; (4) charting the data; (5) collating, summarising and reporting the results; and, (6) consulting with relevant stakeholders.<sup>15,16</sup> The research team has expertise in peer support across chronic conditions (SEPM, JS, SA, SNS, MLAN, SJTG, SBJ), online interventions (SA, SM, SBJ), and knowledge synthesis methods (SEPM, LP, JRT, MLAN, SJTG, SBJ). Although traditionally applied to systematic review protocols, the Preferred Reporting Items for Systematic Reviews and Meta-analysis for Protocols (PRISMA-P)<sup>17</sup> was used to draft this protocol.

### *Eligibility criteria*

For the purpose of this review, we will include chronic diseases identified by the Public Health Agency of Canada (PHAC), including cancer, heart (cardiovascular disease), hypertension, stroke, chronic respiratory diseases (asthma, chronic obstructive pulmonary disease, sleep apnea), diabetes, inflammatory bowel diseases (Crohn's Disease, ulcerative colitis) multiple sclerosis, neurological conditions (e.g., Alzheimer's disease and other dementias, cerebral palsy, epilepsy, multiple sclerosis, Parkinson's disease/parkinsonism, traumatic brain injury, and traumatic spinal cord injury (SCI)), arthritis, and osteoporosis.<sup>18</sup> Mental illness was excluded from the list given that peer support interventions for this group may have particularly unique features not generalizable to other chronic disease patient populations. Similarly, in a systematic review on the effectiveness of quality improvement strategies (i.e., including patient education and promotion of self-management) for coordination of care to reduce use of health

1  
2  
3 care services, Tricco and colleagues<sup>19</sup> determined that these quality improvement strategies  
4 reduced hospital admissions among patients with chronic conditions other than mental illness,  
5  
6 indicating that different approaches are needed for mental health. To this list, we have also  
7  
8 included HIV/AIDS (which, from our preliminary research, has a significant amount of literature  
9  
10 on peer support interventions,<sup>20</sup> and is increasingly being viewed as a chronic condition).  
11  
12  
13 Studies including individuals with co-morbidities (including mental illness) will be accepted.  
14  
15 Thus, to be eligible for inclusion, the studies must report on adults ( $\geq 18$  years of age) with one of  
16  
17 these PHAC chronic conditions (excluding mental illness) or HIV/AIDS. We will limit our  
18  
19 review to peer support interventions delivered through on-line formats. Peer support in the  
20  
21 context of chronic disease management is operationalized as “support for a person with a chronic  
22  
23 condition from someone with the same condition or similar circumstances”.<sup>6,11</sup> This type of  
24  
25 support could be emotional, informational, and/or appraisal.<sup>12</sup> Examples of on-line peer  
26  
27 interventions could include Skype-based discussions, social media peer interactions, or text  
28  
29 messages from a peer(s). Therefore, interventions that are professional-led groups that  
30  
31 encourage face-to-face peer interactions, involve community health workers who are not peers  
32  
33 (i.e., health care professionals), support groups, and provide telephone-based peer support will be  
34  
35 excluded. All study designs will be included (e.g., observational studies, randomized controlled  
36  
37 trials and qualitative studies). Only studies published from January 2012-April 2017 will be  
38  
39 included. We have included studies from the last 5 years to ensure relevance to the current  
40  
41 healthcare context, in technology, and feasibility. Furthermore, only English-language studies  
42  
43 will be included, which may result in a predisposition in results towards English language  
44  
45 speaking countries.  
46  
47  
48  
49  
50  
51  
52  
53  
54  
55  
56  
57  
58  
59  
60

### *Search strategy and information sources*

Literature search strategies will be developed using medical subject headings (MeSH) and text words related to chronic conditions and peer support interventions. Studies will be identified by searching Medline (OVID interface), CINAHL (EBSCO interface), EMBASE (OVID interface), PsycInfo (OVID interface), and Cochrane Central Register Controlled Trials (Cochrane Library) and PEDro (physiotherapy evidence database). The search strategy for Medline can be found in the Supplementary File. A hand search of the reference lists from reviews and selected articles will be made to ensure literature saturation. Finally, experts in the field of peer support will be contacted and consulted in order to ensure that all relevant data is obtained, including members of the research team. An information specialist (LP) who is expert in systematic and scoping reviews will conduct all of the literature searches.

### *Study selection*

To promote the reliability of screening by the two reviewers, a pilot test of the level 1 screening form based on the criteria outlined above will be conducted on a random sample of approximately 100 articles. The  $\kappa$  statistic will then be calculated to determine the inter-rater reliability for study inclusion.<sup>21</sup> If low agreement is observed, the inclusion and exclusion criteria will be simplified to increase the consistent application of the selection criteria. Two reviewers will independently screen the titles and abstracts identified by the literature search for inclusion using the screening form (i.e., level 1 screening). The full text of potentially relevant articles will then be collected and screened to determine final inclusion (i.e., level 2 screening). A pilot test of the level 2 screening form will be performed on approximately 1% of the articles and the inter-rater reliability for study inclusion will also be calculated.<sup>21</sup> A third reviewer who is knowledgeable in the research area will be available to resolve conflicts, if necessary.



### ***Data items and data collection process***

Abstracted data will include study characteristics (e.g., year of publication, country of study), participant population (e.g., chronic disease condition, income, ethnicity, age, sex, education), key characteristics of the intervention (e.g., duration, frequency, delivery setting, type of intervention, type of support provided - emotional, informational and appraisal, underlying theories for the intervention/behaviour change techniques/working mechanisms, context etc.), and type of outcome collected (if applicable) as well as results (i.e., efficacy or effectiveness). Outcomes reported may include, but are not limited to, self-efficacy, depression, and quality of life. In fact, we aim to identify the variety of reported impacts. Additional categories may be identified through the completion of the search and through discussions with the research team and key stakeholders. A data abstraction form will also be pilot tested and modified if poor agreement is observed. For example, any wording on the form that may be related to poor agreement will be reviewed and improved. Two reviewers will independently abstract all of the data and a discussion or the involvement of a third reviewer will resolve disagreements. Study quality will not be evaluated as the purpose of a scoping review is to identify gaps in the literature and future areas for a systematic review.<sup>15,16</sup> Distiller SR will be used to manage the records and data throughout the review.

### ***Synthesis***

The data from this scoping review will be summarized quantitatively using numerical counts and qualitatively using thematic analysis and will be grouped by chronic condition type (e.g., what kind of underlying theories are found in on-line peer support interventions in cancer?) This data will be coded/analyzed manually. The results of this review will determine the key characteristics (e.g., duration, frequency, delivery setting, type of intervention, type of support

1  
2  
3 provided - emotional, informational and appraisal, underlying theories for the  
4  
5 intervention/behaviour change techniques/working mechanisms, context etc.) of on-line peer  
6  
7 support interventions for adults with chronic conditions. This scoping review will identify gaps  
8  
9 in the literature as well as future areas for study either via implementation studies, consensus  
10  
11 meeting, or systematic review.  
12  
13

### 14 15 **Dissemination**

16  
17 Knowledge translation activities will occur at the beginning of the review and continue  
18  
19 throughout with dissemination of the research question to key stakeholders such as the Ontario  
20  
21 Ministry of Health and Long-term Care, the Ontario Peer Development Initiative, March of  
22  
23 Dimes Canada, SCI Canada, Rick Hansen Institute, and the Ontario Neurotrauma Foundation.  
24  
25 End-of-grant knowledge translation could also take place through these organizations and their  
26  
27 outlets (e.g., print and online newsletters) as well as through traditional knowledge translation  
28  
29 mechanisms (e.g., peer-reviewed journals and conference). For example, the results of the  
30  
31 scoping review will be presented at meetings locally, nationally, and internationally (e.g.,  
32  
33 National Conference on Peer Support, American Medical Informatics Association) and published  
34  
35 in a peer-reviewed journal so that results are available to the appropriate academic and clinical  
36  
37 audiences. Finally, partnerships with local clinical programs and/or research initiatives will be  
38  
39 made so that the results are disseminated in a timely and effective manner.  
40  
41  
42  
43  
44  
45

46  
47 There will be expected limitations and strengths to this review. For example, this review  
48  
49 will not include (primary) mental health conditions and a variety of other disabilities. A number  
50  
51 of problem-solving approaches for mental health conditions are emerging as quite effective when  
52  
53 administered by nonprofessionals, including in low-resource settings.<sup>22-24</sup> The possibility of  
54  
55 implementing these on-line would represent exciting advances in the field of peer support, and  
56  
57  
58  
59  
60

1  
2  
3 thus, a future, separate systematic/scoping review on on-line peer support interventions for  
4  
5 mental health conditions should be considered. Furthermore, this review will be limited to  
6  
7 English language studies only. Lastly, our review will be limited to the published research  
8  
9 literature. We acknowledge that we will be excluding reports on available, relevant programs  
10  
11 but not published in these arenas. However, the currently proposed scoping review has a number  
12  
13 of strengths - it is guided by known methodological frameworks and all phases will be conducted  
14  
15 in duplicate, etc). This review will contribute to critical and emerging perspectives on peer  
16  
17 support. For example, the results of the review will identify the key features of on-line peer  
18  
19 support interventions, and in doing so, assist in the future development of other on-line peer  
20  
21 support programs (i.e., so that effective and sustainable programs can be developed). Similarly,  
22  
23 the current review will provide considerations for programs that are not yet in the on-line format  
24  
25 so that they can be modified with features that are unique to the on-line environment.  
26  
27  
28  
29  
30

### 31 **Footnotes**

32  
33  
34 **Contributors:** SEPM conceived of the scoping review, together with JS, LP and SBJ. SEPM  
35 wrote the first draft of the protocol. SEPM is the guarantor of the review. SEPM, JS, and LP  
36 were involved in the preliminary literature review. LP conducted the literature search. LP  
37 provided methodological expertise (knowledge synthesis). JS, SA, SNS, JRT, SJTG, and MLAN  
38 provided critical content expertise on peer support that was integrated into the current protocol.  
39 SEPM, JS, LP, SA, SNS, JRT, MLAN, SJTG, SH, and SBJ were involved in editing and revising  
40 the protocol for important intellectual content. SEPM, JS, LP, SA, SNS, JRT, MLAN, SJTG,  
41 SH, and SBJ approved the final version of the protocol.  
42  
43  
44

45 **Funding:** This work was supported by the Ontario Neurotrauma Foundation (ONF) and the  
46 Rick Hansen Institute (RHI). The ONF and RHI had no role in developing this protocol. SEP  
47 Munce is/has been supported by a Heart and Stroke Foundation of Canada Focus on Stroke  
48 Fellowship, Toronto Rehabilitation Institute-University Health Network, Canadian Institutes of  
49 Health Research Fellowship, and a European Stroke Research Foundation Investigator Award.  
50 SNS is supported by a salary award from FRQS Chercheurs-Boursiers, Junior 1 program.  
51  
52  
53  
54

55 **Competing interests:** None.  
56

57 **Provenance and peer review:** Not commissioned; externally peer reviewed.  
58  
59  
60

## References

1. Public Health Agency of Canada. How healthy are Canadians? A trend analysis of the health of Canadians from a healthy living and chronic disease perspective. Ottawa, ON: Public Health Agency of Canada, 2016.
2. Elmslie, K. Against the growing burden of disease. Ottawa, ON: Public Health Agency of Canada, 2016.
3. US Department of Health and Human Services. Multiple chronic conditions – a strategic framework: optimum health and quality of life for individuals with multiple chronic conditions. Washington, DC: US Department of Health and Human Services, 2010.
4. Gerteis J, Izrael D, Deitz D, et al. Multiple chronic conditions chartbook. Rockville, MD: Agency for Healthcare Research and Quality, 2014.
5. Australian Institute of Health and Welfare. Authoritative information and statistics to promote better health and well-being: chronic diseases. <http://www.aihw.gov.au/chronic-diseases/>
6. Heisler M. Overview of peer support models to improve diabetes self-management and clinical outcomes. *Diabetes Spectrum* 2007; 20:214-223.
7. de Silva D. Helping people help themselves: a review of the evidence considering whether or not it is worthwhile to support self-management. London, UK: The Health Foundation, 2011.
8. Health Council of Canada. Self-management support for Canadians with chronic conditions: a focus for primary care. [http://www.healthcouncilcanada.ca/rpt\\_det.php?id=372](http://www.healthcouncilcanada.ca/rpt_det.php?id=372)
9. Cook JA, Copeland ME, Corey L, et al. Developing the evidence base for peer-led services: changes among participants following Wellness Recovery Action Planning (WRAP) Education in two statewide initiatives. *Psychiatr Rehabil J* 2010;34:113-20.
10. Chronic Illness Alliance. Peer support for chronic and complex conditions: a literature review. <http://www.chronicillness.org.au/>
11. Lauckner HM, Hutchinson SL. Peer support for people with chronic conditions in rural areas: a scoping review. *Rural Remote Health* 2016; 16:3601.
12. Dennis C. Peer support within a health care context: a concept analysis. *Int J Nurs Stud* 2003; 40:321-32.
13. Eng E, Parker E, Harlan C. Lay health adviser intervention strategies: a continuum, from natural helping to paraprofessional helping. *Health Educ Behav* 1997; 24:413-417.
14. Statistics Canada. Internet in 4 out of 5 households. Ottawa, ON: Statistics Canada, 2010.

- 1  
2  
3 15. Arksey H, O'Malley L. Scoping studies: towards a methodological framework. *Int J Soc*  
4 *Res Methodol* 2005; 8:19-32  
5  
6  
7 16. Levac DC, Colquhoun H, O'Brien KK. Scoping studies: advancing the methodology.  
8 *Implement Sci* 2010; 5:69.  
9  
10 17. Shamseer L, Moher D, Clarke M et al. Preferred reporting items for systematic review and  
11 meta-analysis protocols (PRISMA-P) 2015: elaboration and explanation. *BMJ* 2015; 349.  
12  
13 18. Public Health Agency of Canada. Chronic diseases. [http://www.phac-aspc.gc.ca/cd-](http://www.phac-aspc.gc.ca/cd-mc/index-eng.php)  
14 [mc/index-eng.php](http://www.phac-aspc.gc.ca/cd-mc/index-eng.php)  
15  
16  
17 19. Tricco AC, Antony J, Ivers NM, et al. Effectiveness of quality improvement strategies for  
18 coordination of care to reduce use of health care services: a systematic review and meta-analysis.  
19 *CMAJ* 2014; 186:E568-78.  
20  
21 20. Prestage G, Brown G, Allan B, et al. Impact of peer support on behaviour change among  
22 newly diagnosed Australian gay men. *J Acquir Immune Defic Syndr* 2016; 72:565-71.  
23  
24 21. Landis JR, Koch GG. The measurement of observer agreement for categorical data.  
25 *Biometrics* 1977; 33:159-74.  
26  
27 22 Rahman A, Malik A, Sikabder S, et al. Cognitive behaviour therapy-based intervention by  
28 community health workers for mothers with depression and their infants in rural Pakistan: a  
29 cluster randomized controlled trial. *Lancet* 2008; 372:902-9.  
30  
31 23 Chowdhary N, Anand A, Dimidjian S, et al. The Healthy Activity Program lay counsellor  
32 delivered treatment for severe depression in India: systematic development and randomized  
33 evaluation. *Br J Psychiatry* 2016; 208:381-8.  
34  
35 24 Rahman A, Hamdani SU, Awan NR, et al. Effect of a multicomponent behavioral  
36 intervention in adults impaired by psychological distress in a conflict-affected area of Pakistan:  
37 a randomized clinical trial. *JAMA* 2016; 316:2609-2617.  
38  
39  
40  
41  
42  
43  
44  
45  
46  
47  
48  
49  
50  
51  
52  
53  
54  
55  
56  
57  
58  
59  
60

Database: Ovid MEDLINE: Epub Ahead of Print, In-Process & Other Non-Indexed Citations, Ovid MEDLINE® Daily and Ovid MEDLINE® <1946-Present>

Search Strategy:

---

- 1 Diabetes Mellitus/ [ Diabetes Mellitus ] (106925)
- 2 Diabetes Mellitus, Type 1/ (69361)
- 3 Diabetes Mellitus, Type 2/ (108663)
- 4 Diabetes Complications/ (39462)
- 5 diabet\$.tw. (523081)
- 6 (insulin\$ adj depend\$).tw. (29179)
- 7 insulin?depend\$.tw. (43)
- 8 exp Pulmonary Disease, Chronic Obstructive/ [ COPD ] (46140)
- 9 COPD.tw. (35401)
- 10 COAD.tw. (245)
- 11 "chronic airflow obstruction".tw. (543)
- 12 "obstructive lung disease\$.tw. (6025)
- 13 "obstructive pulmonary disease\$.tw. (38490)
- 14 Cardiovascular Diseases/ [ Cardiovascular Disease/Stroke/Hypertension ] (126070)
- 15 Cerebrovascular Disorders/ (45398)
- 16 exp Heart Diseases/ (1028587)
- 17 exp Hypertension/ (238378)
- 18 exp Hyperlipidemias/ (62478)
- 19 exp Stroke/ (107275)
- 20 (cardiovascular adj disease?).tw. (132985)
- 21 (cardio-vascular adj disease?).tw. (566)
- 22 (cardiac adj arrest\$).tw. (27050)
- 23 (coronary adj disease\$).tw. (13690)
- 24 cerebrovasc\$.tw. (45920)
- 25 (cerebral adj vasc\$).tw. (7701)
- 26 (heart adj failure).tw. (136198)
- 27 (heart adj disease\$).tw. (148046)
- 28 (heart adj attack\$).tw. (4829)
- 29 "high blood pressure".tw. (12751)
- 30 hypertensi\$.tw. (380148)
- 31 hyperlipid\$.tw. (26714)
- 32 hypercholesterol\$.tw. (31280)
- 33 poststroke.tw. (3944)

1  
2  
3  
4 34 post-stroke.tw. (6330)  
5 35 stroke.tw. (191278)  
6 36 exp Carcinoma/ [ Cancer ] (575751)  
7 37 exp Neoplasms/ (2988852)  
8 38 carcinoma\$.tw. (574831)  
9 39 neoplasm\$.tw. (119477)  
10 40 tumor\$.tw. (1441627)  
11 41 cancer\$.tw. (1434821)  
12 42 exp Osteoporosis/ [ Osteoporosis ] (50872)  
13 43 osteoporosis.tw. (56120)  
14 44 exp Arthritis/ [ Arthritis ] (235024)  
15 45 arthriti\$.tw. (158150)  
16 46 osteoarthriti\$.tw. (51431)  
17 47 osteo-arthriti\$.tw. (404)  
18 48 rheumati\$.tw. (49733)  
19 49 exp Asthma/ [ Asthma ] (117410)  
20 50 asthma\$.tw. (138598)  
21 51 exp Inflammatory Bowel Diseases/ [ IBD ] (69727)  
22 52 "inflammatory bowel disease?".tw. (36528)  
23 53 IBD.tw. (17629)  
24 54 (ulcer\$ adj colit\$).tw. (32683)  
25 55 crohn\$.tw. (39743)  
26 56 Motor Neuron Disease/ [ Neurological Conditions ] (4006)  
27 57 "motor neuron disease?".tw. (4361)  
28 58 (motoneuron adj disease).tw. (15)  
29 59 (motoneuron adj disease).tw. (267)  
30 60 Multiple Sclerosis/ [ MS ] (46517)  
31 61 Multiple Sclerosis, Chronic Progressive/ (1723)  
32 62 Multiple Sclerosis, Relapsing-Remitting/ (4962)  
33 63 (multiple adj sclerosis).tw. (62635)  
34 64 exp Spinal Cord Injuries/ [ SCI ] (43135)  
35 65 exp Paraplegia/ (12583)  
36 66 exp Quadriplegia/ (7638)  
37 67 paraplegi\$.tw. (14828)  
38 68 quadriplegi\$.tw. (3836)  
39 69 tetraplegi\$.tw. (3762)  
40 70 ("spinal cord" adj injur\$).tw. (31617)  
41  
42  
43  
44  
45  
46  
47  
48  
49  
50  
51  
52  
53  
54  
55  
56  
57  
58  
59  
60

1  
2  
3  
4 71 ("spinal cord" adj trauma\$.tw. (881)  
5 72 SCI.tw. (28016)  
6 73 exp Sleep Apnea Syndromes/ [ Sleep Apnea ] (29614)  
7 74 (sleep adj apn?ea?).tw. (29165)  
8 9  
9 75 exp HIV/ [ HIV/AIDS ] (90847)  
10 76 Acquired Immunodeficiency Syndrome/ (76092)  
11 77 AIDS.tw. (137756)  
12 78 HIV.tw. (275603)  
13 79 (human adj immunodeficiency).tw. (80198)  
14 80 "acquired immunodeficiency syndrome".tw. (15520)  
15 81 "acquired immune deficiency syndrome".tw. (5532)  
16 82 or/1-81 (6864407)  
17 83 Peer Group/ [ Peer Support ] (17371)  
18 84 Volunteers/ (8787)  
19 85 peer.tw. (47864)  
20 86 peers.tw. (23571)  
21 87 volunteer?.tw. (166313)  
22 88 advice.tw. (40431)  
23 89 advis\$.tw. (58943)  
24 90 (health adj coach\$.tw. (456)  
25 91 counsel\$.tw. (89121)  
26 92 (lay\$ adj led).tw. (121)  
27 93 (lay\$ adj run).tw. (12)  
28 94 (lay\$ adj help\$.tw. (91)  
29 95 (lay\$ adj support\$.tw. (288)  
30 96 (lay\$ adj visit\$.tw. (11)  
31 97 (lay\$ adj based).tw. (514)  
32 98 (lay\$ adj deliver\$.tw. (19)  
33 99 (user\$ adj led).tw. (102)  
34 100 (user\$ adj run).tw. (15)  
35 101 (user\$ adj based).tw. (363)  
36 102 layperson\$.tw. (1198)  
37 103 (lay adj person\$.tw. (666)  
38 104 (community adj person\$.tw. (78)  
39 105 (support adj person\$.tw. (1127)  
40 106 (community adj based).tw. (48065)  
41 107 (community adj visit\$.tw. (64)  
42  
43  
44  
45  
46  
47  
48  
49  
50  
51  
52  
53  
54  
55  
56  
57  
58  
59  
60



- 1
- 2
- 3
- 4 108 (home adj based).tw. (7657)
- 5 109 (home adj visit\$.tw. (7270)
- 6 110 (expert adj patient?).tw. (207)
- 7
- 8 111 (non adj professional?).tw. (1234)
- 9 112 nonprofessional?.tw. (1057)
- 10 113 (non adj medical).tw. (4572)
- 11 114 nonmedical.tw. (3177)
- 12 115 (mutual adj aid).tw. (323)
- 13 116 (mutual adj support?).tw. (510)
- 14 117 (supportive adj relationship).tw. (152)
- 15 118 mentor\$.tw. (11672)
- 16 119 (community adj worker?).tw. (368)
- 17 120 (lay adj worker?).tw. (84)
- 18 121 (support adj worker?).tw. (663)
- 19 122 (voluntary adj work\$.tw. (251)
- 20 123 (voluntary adj care).tw. (33)
- 21 124 (voluntary adj involvement).tw. (19)
- 22 125 (voluntary adj help\$.tw. (43)
- 23 126 (voluntary adj counsel\$.tw. (1052)
- 24 127 or/83-126 (498143)
- 25 128 Computer-Assisted Instruction/ (11051)
- 26 129 exp Internet/ (64547)
- 27 130 exp Software/ (133078)
- 28 131 Mobile Applications/ (1899)
- 29 132 User-Computer Interface/ (33561)
- 30 133 Web Browser/ (384)
- 31 134 Computers/ (50698)
- 32 135 exp Microcomputers/ (18257)
- 33 136 exp Cell Phones/ (8858)
- 34 137 Educational Technology/ (1342)
- 35 138 Electronic Mail/ (2366)
- 36 139 Webcasts/ (449)
- 37 140 exp Videoconferencing/ (1436)
- 38 141 chatroom\$.tw. (49)
- 39 142 (chat adj room\$.tw. (275)
- 40 143 email\$.tw. (5122)
- 41 144 e-mail\$.tw. (6846)
- 42
- 43
- 44
- 45
- 46
- 47
- 48
- 49
- 50
- 51
- 52
- 53
- 54
- 55
- 56
- 57
- 58
- 59
- 60

1  
2  
3  
4 145 (web adj based).tw. (22206)  
5 146 (computer adj based).tw. (12251)  
6  
7 147 online.tw. (70773)  
8 148 (computer adj mediated).tw. (447)  
9  
10 149 virtual.tw. (43005)  
11 150 (computer adj assisted).tw. (22697)  
12  
13 151 Internet.mp. (83576)  
14 152 (computer adj supported).tw. (425)  
15 153 (hand adj held).tw. (5605)  
16  
17 154 "personal digital assistant?".tw. (990)  
18 155 ebased.tw. (0)  
19  
20 156 e-based.tw. (227)  
21 157 on-line.tw. (23870)  
22  
23 158 computer\$.tw. (268656)  
24 159 (information adj technolog\$.tw. (10318)  
25  
26 160 website\$.tw. (18794)  
27 161 web-site\$.tw. (7251)  
28  
29 162 e-health.tw. (1569)  
30 163 ehealth.tw. (1427)  
31  
32 164 (electronic adj health).tw. (9090)  
33 165 (mobile adj phone\$.tw. (5367)  
34 166 (cell adj phone\$.tw. (1928)  
35 167 smartphone\$.tw. (4315)  
36 168 smart-phone\$.tw. (677)  
37  
38 169 (mobile adj app\$.tw. (1447)  
39 170 or/128-169 (626750)  
40  
41 171 exp adult/ [ Adult filter - validated ] (6417105)  
42 172 adult.mp. (5014578)  
43 173 Middle Aged/ (3849721)  
44 174 age\$.tw. (3111391)  
45 175 or/171-174 (8450657)  
46  
47 176 82 and 127 and 170 and 175 (3766)  
48 177 exp Animals/ not (exp Animals/ and Humans/) (4384144)  
49 178 176 not 177 (3764)  
50  
51 179 limit 178 to (english language and yr="2007 -Current") (2628)  
52  
53  
54  
55  
56  
57  
58  
59  
60

\*\*\*\*\*

**PRISMA-P (Preferred Reporting Items for Systematic review and Meta-Analysis Protocols) 2015 checklist: recommended items to address in a systematic review protocol\* - NOTE that the current manuscript is a **scoping review protocol****

| Section and topic                 | Item No | Checklist item                                                                                                                                                                                                                              |
|-----------------------------------|---------|---------------------------------------------------------------------------------------------------------------------------------------------------------------------------------------------------------------------------------------------|
| <b>ADMINISTRATIVE INFORMATION</b> |         |                                                                                                                                                                                                                                             |
| Title:                            |         |                                                                                                                                                                                                                                             |
| Identification                    | 1a      | Identify the report as a protocol of a systematic review <b>page 1</b>                                                                                                                                                                      |
| Update                            | 1b      | If the protocol is for an update of a previous systematic review, identify as such <b>N/A</b> .                                                                                                                                             |
| Registration                      | 2       | If registered, provide the name of the registry (such as PROSPERO) and registration number <b>N/A as this is a scoping review.</b>                                                                                                          |
| Authors:                          |         |                                                                                                                                                                                                                                             |
| Contact                           | 3a      | Provide name, institutional affiliation, e-mail address of all protocol authors; provide physical mailing address of corresponding author <b>page 1</b>                                                                                     |
| Contributions                     | 3b      | Describe contributions of protocol authors and identify the guarantor of the review <b>page 9</b>                                                                                                                                           |
| Amendments                        | 4       | If the protocol represents an amendment of a previously completed or published protocol, identify as such and list changes; otherwise, state plan for documenting important protocol amendments <b>N/A</b>                                  |
| Support:                          |         |                                                                                                                                                                                                                                             |
| Sources                           | 5a      | Indicate sources of financial or other support for the review <b>page 9</b>                                                                                                                                                                 |
| Sponsor                           | 5b      | Provide name for the review funder and/or sponsor <b>page 9</b>                                                                                                                                                                             |
| Role of sponsor or funder         | 5c      | Describe roles of funder(s), sponsor(s), and/or institution(s), if any, in developing the protocol <b>page 9</b>                                                                                                                            |
| <b>INTRODUCTION</b>               |         |                                                                                                                                                                                                                                             |
| Rationale                         | 6       | Describe the rationale for the review in the context of what is already known <b>pages 3-4</b>                                                                                                                                              |
| Objectives                        | 7       | Provide an explicit statement of the question(s) the review will address with reference to participants, interventions, comparators, and outcomes (PICO) <b>page 4</b>                                                                      |
| <b>METHODS</b>                    |         |                                                                                                                                                                                                                                             |
| Eligibility criteria              | 8       | Specify the study characteristics (such as PICO, study design, setting, time frame) and report characteristics (such as years considered, language, publication status) to be used as criteria for eligibility for the review <b>page 5</b> |
| Information sources               | 9       | Describe all intended information sources (such as electronic databases, contact with study authors, trial registers or other grey literature sources) with planned dates of coverage <b>page 6</b>                                         |
| Search strategy                   | 10      | Present draft of search strategy to be used for at least one electronic database, including planned limits, such that it could be repeated <b>Additional File 1</b>                                                                         |
| Study records:                    |         |                                                                                                                                                                                                                                             |

1  
2  
3  
4  
5  
6  
7  
8  
9  
10  
11  
12  
13  
14  
15  
16  
17  
18  
19  
20  
21  
22  
23  
24  
25  
26  
27  
28  
29  
30  
31  
32  
33  
34  
35  
36  
37  
38  
39  
40  
41  
42  
43  
44  
45  
46  
47  
48  
49

|                                    |     |                                                                                                                                                                                                                                                              |
|------------------------------------|-----|--------------------------------------------------------------------------------------------------------------------------------------------------------------------------------------------------------------------------------------------------------------|
| Data management                    | 11a | Describe the mechanism(s) that will be used to manage records and data throughout the review <b>page 7</b>                                                                                                                                                   |
| Selection process                  | 11b | State the process that will be used for selecting studies (such as two independent reviewers) through each phase of the review (that is, screening, eligibility and inclusion in meta-analysis) <b>pages 6-7</b>                                             |
| Data collection process            | 11c | Describe planned method of extracting data from reports (such as piloting forms, done independently, in duplicate), any processes for obtaining and confirming data from investigators <b>page 7</b>                                                         |
| Data items                         | 12  | List and define all variables for which data will be sought (such as PICO items, funding sources), any pre-planned data assumptions and simplifications <b>pages 7-8 (data abstraction)</b>                                                                  |
| Outcomes and prioritization        | 13  | List and define all outcomes for which data will be sought, including prioritization of main and additional outcomes, with rationale <b>pages 7-8 (data abstraction)</b>                                                                                     |
| Risk of bias in individual studies | 14  | Describe anticipated methods for assessing risk of bias of individual studies, including whether this will be done at the outcome or study level, or both; state how this information will be used in data synthesis <b>N/A as this is a scoping review.</b> |
| Data synthesis                     | 15a | Describe criteria under which study data will be quantitatively synthesised <b>page 7</b>                                                                                                                                                                    |
|                                    | 15b | If data are appropriate for quantitative synthesis, describe planned summary measures, methods of handling data and methods of combining data from studies, including any planned exploration of consistency (such as $I^2$ , Kendall's $\tau$ ) <b>N/A</b>  |
|                                    | 15c | Describe any proposed additional analyses (such as sensitivity or subgroup analyses, meta-regression) <b>N/A</b>                                                                                                                                             |
|                                    | 15d | If quantitative synthesis is not appropriate, describe the type of summary planned <b>N/A</b>                                                                                                                                                                |
| Meta-bias(es)                      | 16  | Specify any planned assessment of meta-bias(es) (such as publication bias across studies, selective reporting within studies) <b>N/A as this is a scoping review.</b>                                                                                        |
| Confidence in cumulative evidence  | 17  | Describe how the strength of the body of evidence will be assessed (such as GRADE) <b>N/A as this is a scoping review.</b>                                                                                                                                   |

**\* It is strongly recommended that this checklist be read in conjunction with the PRISMA-P Explanation and Elaboration (cite when available) for important clarification on the items. Amendments to a review protocol should be tracked and dated. The copyright for PRISMA-P (including checklist) is held by the PRISMA-P Group and is distributed under a Creative Commons Attribution Licence 4.0.**

*From: Shamseer L, Moher D, Clarke M, Ghersi D, Liberati A, Petticrew M, Shekelle P, Stewart L, PRISMA-P Group. Preferred reporting items for systematic review and meta-analysis protocols (PRISMA-P) 2015: elaboration and explanation. BMJ. 2015 Jan 2;349(jan02 1):g7647.*
