# Supplementary material for: Online peer support interventions for chronic conditions: a scoping review protocol
Source: PubMed Central journal article supplement — BMJ Open. 2017 Sep 24;7(9):e017999. doi: 10.1136/bmjopen-2017-017999 (PMC5623492; doi:10.1136/bmjopen-2017-017999), 2017-09-24
Supplement: bmjopen-2017-017999supp001.pdf [file bmjopen-2017-017999supp001.pdf]

Database: Ovid MEDLINE: Epub Ahead of Print, In-Process & Other Non-Indexed Citations, Ovid MEDLINE® Daily and Ovid MEDLINE® <1946-Present>

Search Strategy:

---

- 1 Diabetes Mellitus/ [ Diabetes Mellitus ] (106925)
- 2 Diabetes Mellitus, Type 1/ (69361)
- 3 Diabetes Mellitus, Type 2/ (108663)
- 4 Diabetes Complications/ (39462)
- 5 diabet\$.tw. (523081)
- 6 (insulin\$ adj depend\$.tw. (29179)
- 7 insulin?depend\$.tw. (43)
- 8 exp Pulmonary Disease, Chronic Obstructive/ [ COPD ] (46140)
- 9 COPD.tw. (35401)
- 10 COAD.tw. (245)
- 11 "chronic airflow obstruction".tw. (543)
- 12 "obstructive lung disease\$.tw. (6025)
- 13 "obstructive pulmonary disease\$.tw. (38490)
- 14 Cardiovascular Diseases/ [ Cardiovascular Disease/Stroke/Hypertension ] (126070)
- 15 Cerebrovascular Disorders/ (45398)
- 16 exp Heart Diseases/ (1028587)
- 17 exp Hypertension/ (238378)
- 18 exp Hyperlipidemias/ (62478)
- 19 exp Stroke/ (107275)
- 20 (cardiovascular adj disease?).tw. (132985)
- 21 (cardio-vascular adj disease?).tw. (566)
- 22 (cardiac adj arrest\$.tw. (27050)
- 23 (coronary adj disease\$.tw. (13690)
- 24 cerebrovasc\$.tw. (45920)
- 25 (cerebral adj vasc\$.tw. (7701)
- 26 (heart adj failure).tw. (136198)
- 27 (heart adj disease\$.tw. (148046)
- 28 (heart adj attack\$.tw. (4829)
- 29 "high blood pressure".tw. (12751)
- 30 hypertensi\$.tw. (380148)
- 31 hyperlipid\$.tw. (26714)
- 32 hypercholesterol\$.tw. (31280)
- 33 poststroke.tw. (3944)

34 post-stroke.tw. (6330)  
35 stroke.tw. (191278)  
36 exp Carcinoma/ [ Cancer ] (575751)  
37 exp Neoplasms/ (2988852)  
38 carcinoma\$.tw. (574831)  
39 neoplasm\$.tw. (119477)  
40 tumor\$.tw. (1441627)  
41 cancer\$.tw. (1434821)  
42 exp Osteoporosis/ [ Osteoporosis ] (50872)  
43 osteoporosis.tw. (56120)  
44 exp Arthritis/ [ Arthritis ] (235024)  
45 arthriti\$.tw. (158150)  
46 osteoarthriti\$.tw. (51431)  
47 osteo-arthriti\$.tw. (404)  
48 rheumati\$.tw. (49733)  
49 exp Asthma/ [ Asthma ] (117410)  
50 asthma\$.tw. (138598)  
51 exp Inflammatory Bowel Diseases/ [ IBD ] (69727)  
52 "inflammatory bowel disease?".tw. (36528)  
53 IBD.tw. (17629)  
54 (ulcer\$ adj colit\$).tw. (32683)  
55 crohn\$.tw. (39743)  
56 Motor Neuron Disease/ [ Neurological Conditions ] (4006)  
57 "motor neuron disease?".tw. (4361)  
58 (motoneuron adj disease).tw. (15)  
59 (motoneuron adj disease).tw. (267)  
60 Multiple Sclerosis/ [ MS ] (46517)  
61 Multiple Sclerosis, Chronic Progressive/ (1723)  
62 Multiple Sclerosis, Relapsing-Remitting/ (4962)  
63 (multiple adj sclerosis).tw. (62635)  
64 exp Spinal Cord Injuries/ [ SCI ] (43135)  
65 exp Paraplegia/ (12583)  
66 exp Quadriplegia/ (7638)  
67 paraplegi\$.tw. (14828)  
68 quadriplegi\$.tw. (3836)  
69 tetraplegi\$.tw. (3762)  
70 ("spinal cord" adj injur\$).tw. (31617)

71 ("spinal cord" adj trauma\$.tw. (881)  
72 SCI.tw. (28016)  
73 exp Sleep Apnea Syndromes/ [ Sleep Apnea ] (29614)  
74 (sleep adj apn?ea?).tw. (29165)  
75 exp HIV/ [ HIV/AIDS ] (90847)  
76 Acquired Immunodeficiency Syndrome/ (76092)  
77 AIDS.tw. (137756)  
78 HIV.tw. (275603)  
79 (human adj immunodeficiency).tw. (80198)  
80 "acquired immunodeficiency syndrome".tw. (15520)  
81 "acquired immune deficiency syndrome".tw. (5532)  
82 or/1-81 (6864407)  
83 Peer Group/ [ Peer Support ] (17371)  
84 Volunteers/ (8787)  
85 peer.tw. (47864)  
86 peers.tw. (23571)  
87 volunteer?.tw. (166313)  
88 advice.tw. (40431)  
89 advis\$.tw. (58943)  
90 (health adj coach\$.tw. (456)  
91 counsel\$.tw. (89121)  
92 (lay\$ adj led).tw. (121)  
93 (lay\$ adj run).tw. (12)  
94 (lay\$ adj help\$.tw. (91)  
95 (lay\$ adj support\$.tw. (288)  
96 (lay\$ adj visit\$.tw. (11)  
97 (lay\$ adj based).tw. (514)  
98 (lay\$ adj deliver\$.tw. (19)  
99 (user\$ adj led).tw. (102)  
100 (user\$ adj run).tw. (15)  
101 (user\$ adj based).tw. (363)  
102 layperson\$.tw. (1198)  
103 (lay adj person\$.tw. (666)  
104 (community adj person\$.tw. (78)  
105 (support adj person\$.tw. (1127)  
106 (community adj based).tw. (48065)  
107 (community adj visit\$.tw. (64)

- 108 (home adj based).tw. (7657)
- 109 (home adj visit\$.tw. (7270)
- 110 (expert adj patient?).tw. (207)
- 111 (non adj professional?).tw. (1234)
- 112 nonprofessional?.tw. (1057)
- 113 (non adj medical).tw. (4572)
- 114 nonmedical.tw. (3177)
- 115 (mutual adj aid).tw. (323)
- 116 (mutual adj support?).tw. (510)
- 117 (supportive adj relationship).tw. (152)
- 118 mentor\$.tw. (11672)
- 119 (community adj worker?).tw. (368)
- 120 (lay adj worker?).tw. (84)
- 121 (support adj worker?).tw. (663)
- 122 (voluntary adj work\$.tw. (251)
- 123 (voluntary adj care).tw. (33)
- 124 (voluntary adj involvement).tw. (19)
- 125 (voluntary adj help\$.tw. (43)
- 126 (voluntary adj counsel\$.tw. (1052)
- 127 or/83-126 (498143)
- 128 Computer-Assisted Instruction/ (11051)
- 129 exp Internet/ (64547)
- 130 exp Software/ (133078)
- 131 Mobile Applications/ (1899)
- 132 User-Computer Interface/ (33561)
- 133 Web Browser/ (384)
- 134 Computers/ (50698)
- 135 exp Microcomputers/ (18257)
- 136 exp Cell Phones/ (8858)
- 137 Educational Technology/ (1342)
- 138 Electronic Mail/ (2366)
- 139 Webcasts/ (449)
- 140 exp Videoconferencing/ (1436)
- 141 chatroom\$.tw. (49)
- 142 (chat adj room\$.tw. (275)
- 143 email\$.tw. (5122)
- 144 e-mail\$.tw. (6846)

145 (web adj based).tw. (22206)  
146 (computer adj based).tw. (12251)  
147 online.tw. (70773)  
148 (computer adj mediated).tw. (447)  
149 virtual.tw. (43005)  
150 (computer adj assisted).tw. (22697)  
151 Internet.mp. (83576)  
152 (computer adj supported).tw. (425)  
153 (hand adj held).tw. (5605)  
154 "personal digital assistant?".tw. (990)  
155 ebased.tw. (0)  
156 e-based.tw. (227)  
157 on-line.tw. (23870)  
158 computer\$.tw. (268656)  
159 (information adj technolog\$).tw. (10318)  
160 website\$.tw. (18794)  
161 web-site\$.tw. (7251)  
162 e-health.tw. (1569)  
163 ehealth.tw. (1427)  
164 (electronic adj health).tw. (9090)  
165 (mobile adj phone\$).tw. (5367)  
166 (cell adj phone\$).tw. (1928)  
167 smartphone\$.tw. (4315)  
168 smart-phone\$.tw. (677)  
169 (mobile adj app\$).tw. (1447)  
170 or/128-169 (626750)  
171 exp adult/ [ Adult filter - validated ] (6417105)  
172 adult.mp. (5014578)  
173 Middle Aged/ (3849721)  
174 age\$.tw. (3111391)  
175 or/171-174 (8450657)  
176 82 and 127 and 170 and 175 (3766)  
177 exp Animals/ not (exp Animals/ and Humans/) (4384144)  
178 176 not 177 (3764)  
179 limit 178 to (english language and yr="2007 -Current") (2628)

\*\*\*\*\*
